# Supplementary material for: Metabolomic Profile of Different Dietary Patterns and Their Association with Frailty Index in Community-Dwelling Older Men and Women
Source: MDPI journal article supplement (doi:10.3390/nu14112237), 2022-05-27
Supplement: s1 [file s1]

**Table S1.** Components of dietary patterns.

| MIND Diet Score                    |           | Mediterranean Diet Score                                 |           | AHEI Diet Score                                         |           |
|------------------------------------|-----------|----------------------------------------------------------|-----------|---------------------------------------------------------|-----------|
| MIND Diet Components               |           | Mediterranean Diet Components                            |           | AHEI Diet Components                                    |           |
| Frequency or Specified             | Max score | Serving or Gram (sex-specific median)                    | Max score | Serving or Specified                                    | Max score |
| Green Leafy Vegetables $\geq$ 6/wk | 1         | Vegetables $\geq$ Median                                 | 1         | Vegetables $\geq$ 5                                     | 10        |
| Other Vegetables $\geq$ 1/day      | 1         |                                                          |           |                                                         |           |
| Berries $\geq$ 2/wk                | 1         | Fruits and Nuts $\geq$ Median                            | 1         | Fruits $\geq$ 4                                         | 10        |
| Nuts $\geq$ 5/wk                   | 1         |                                                          |           | Nuts and Legumes $\geq$ 1                               | 10        |
| Beans $\geq$ 3/wk                  | 1         | Legumes $\geq$ Median                                    | 1         |                                                         |           |
| Olive Oil=Primary oil used         | 1         |                                                          |           |                                                         |           |
| Butter, Margarine $<$ 1 T/d        | 1         |                                                          |           |                                                         |           |
| Cheese $<$ 1/wk                    | 1         | Dairy $<$ Median                                         | 1         |                                                         |           |
| Whole Grains $\geq$ 3/d            | 1         | Whole Grains $\geq$ Median                               | 1         | Whole Grains, $\geq$ 90g for men, $\geq$ 75g for women  | 10        |
| Fish (not fried) $\geq$ 1/wk       | 1         | Fish $\geq$ Median                                       | 1         |                                                         |           |
| Poultry (not fried) $\geq$ 2/wk    | 1         |                                                          |           |                                                         |           |
| Red Meat and products $<$ 4/wk     | 1         | Red and Processed Meat $<$ Median                        | 1         | Red and Processed Meat=0                                | 10        |
| Fast Fried Foods $<$ 1/wk          | 1         |                                                          |           |                                                         |           |
| Pastries & Sweets $<$ 5/wk         | 1         |                                                          |           | Sugar-sweetened Beverage and Fruit Juice=0              | 10        |
| Wine, glass=1/d                    | 1         | Ethanol, 10-50g for men, 5-25g for women                 | 1         | Alcohol, 0.5-2 drinks for men, 0.5-1.5 drinks for women | 10        |
|                                    |           | Ratio of Monounsaturated to Saturated Fats $\geq$ Median | 1         | Polyunsaturated Fats $\geq$ 10% of energy               | 10        |
|                                    |           |                                                          |           | <i>trans</i> Fat $\leq$ 0.5% of energy                  | 10        |
|                                    |           |                                                          |           | Long-chain Fats (EPA+DHA) $\geq$ 250mg                  | 10        |
|                                    |           |                                                          |           | Sodium, lowest decile                                   | 10        |
| Total MIND Diet Score              | 15        | Total Med Diet Score                                     | 9         | Total AHEI Diet Score                                   | 110       |

Table S2. Algorithm for construction of frailty index

| Deficit components                    | Cut-offs                                                                                                                                                                       |
|---------------------------------------|--------------------------------------------------------------------------------------------------------------------------------------------------------------------------------|
| Anemia                                | 0 = No, 1= Yes                                                                                                                                                                 |
| Cancer                                |                                                                                                                                                                                |
| Chronic kidney disease                |                                                                                                                                                                                |
| Chronic obstructive pulmonary disease |                                                                                                                                                                                |
| Cognitive impairment                  |                                                                                                                                                                                |
| Congestive heart failure              |                                                                                                                                                                                |
| Depression                            |                                                                                                                                                                                |
| Diabetes                              |                                                                                                                                                                                |
| Heart Disease                         |                                                                                                                                                                                |
| Hip replacement                       |                                                                                                                                                                                |
| Hypertension                          |                                                                                                                                                                                |
| Lower body joint disease              |                                                                                                                                                                                |
| Parkinson`s disease                   |                                                                                                                                                                                |
| Peripheral arterial disease           |                                                                                                                                                                                |
| Stroke                                |                                                                                                                                                                                |
| Walking up/down staircase ten steps   | 0 = No difficulty/very easy/somewhat easy<br>0.33 = With a little or some difficulty<br>0.66 = With a lot of difficulty<br>1 = Unable to do"                                   |
| Lifting/carry 10lbs                   |                                                                                                                                                                                |
| Getting in/out of bed                 | 0= No difficulty and no assistance<br>0.33= With difficulty but no assistance<br>0.66= With difficulty with assistance<br>1= Unable to do                                      |
| Bathing and showering                 |                                                                                                                                                                                |
| Dressing                              |                                                                                                                                                                                |
| Eating                                |                                                                                                                                                                                |
| Toileting                             |                                                                                                                                                                                |
| Walking across small room             | 0 = No difficulty or don't do (unrelated to health)<br>0.33 = A little or some difficulty or don't do because of health<br>0.66 = "A lot" difficulty doing<br>1 = unable to do |
| Heavy housework                       |                                                                                                                                                                                |
| Food preparation                      |                                                                                                                                                                                |
| Shopping                              |                                                                                                                                                                                |
| Using telephone                       |                                                                                                                                                                                |
| Medication use                        |                                                                                                                                                                                |
| Managing finances                     | 0 = No<br>0.5 = Either urinary or fecal incontinence<br>1 = Both urinary and fecal incontinence                                                                                |
| Continence                            |                                                                                                                                                                                |
| Self-rated health                     | Excellent = 0, very good = 0.25, good = 0.50, fair = 0.75, poor = 1                                                                                                            |
| Feel depressed (CES-D)                | 0 = Rarely<br>0.33 = Some of the time<br>0.66 = Occasionally or moderately<br>1 = Most or all the time                                                                         |
| Feel everything is an effort (CES-D)  |                                                                                                                                                                                |
| Could not get going (CES-D)           |                                                                                                                                                                                |
| Feel lonely (CES-D)                   | 0 = Most or all the time<br>0.33 = Occasionally or moderately<br>0.66 = Some of the time<br>1 = Rarely                                                                         |
| Feel happy (CES-D)                    |                                                                                                                                                                                |
| Orientation time (MMSE)               | 0 = no error                                                                                                                                                                   |
| Orientation place (MMSE)              | 0.50 = 1 error                                                                                                                                                                 |
| Attention (MMSE)                      | 1 = 2 or more errors                                                                                                                                                           |
| Recall (MMSE)                         | 0 = three correct, 0.50 = two correct, 1 = one or none correct                                                                                                                 |
| Weight loss 5% in past year           | 0 = No, 1= Yes                                                                                                                                                                 |
| Low physical activity                 | 0 = No, 1= Yes                                                                                                                                                                 |
| Slow gait speed                       | 0 = Normal, 1=lowest quintile, stratified sex adjusted for height                                                                                                              |
| Low grip strength                     | 0 = Normal, 1=lowest quintile, stratified by sex adjusted BMI                                                                                                                  |

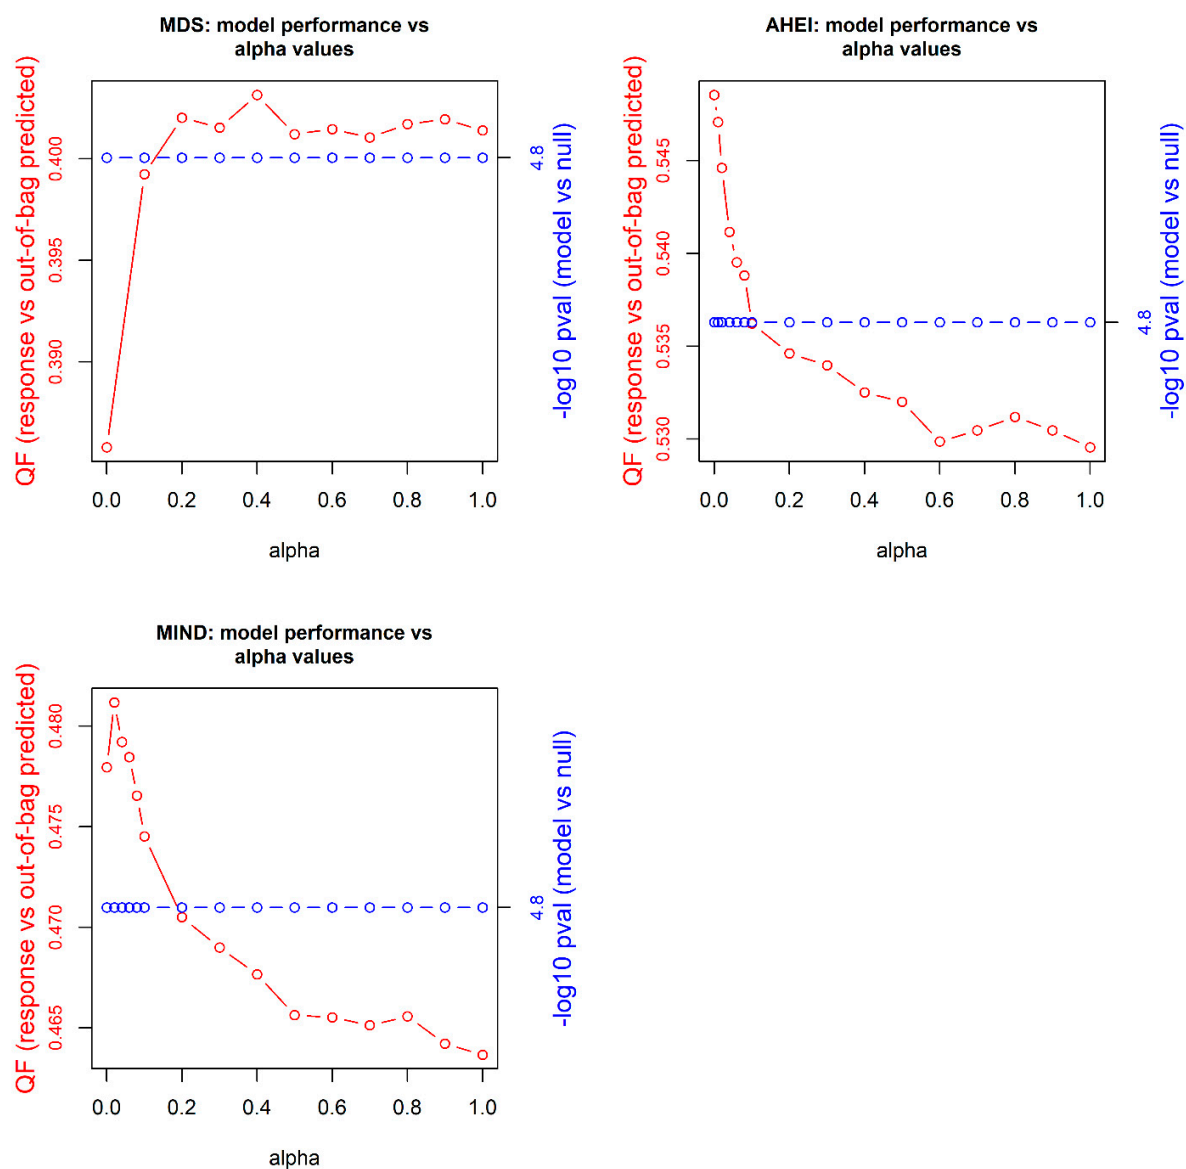

**Figure S1.** Cross-validated performance of prediction models across alpha values. The figure displays results from elastic net regression models runs. Quality function (QF) or  $-\log_{10}$  of statistical significance (p-value of model vs null) across difference alpha values.

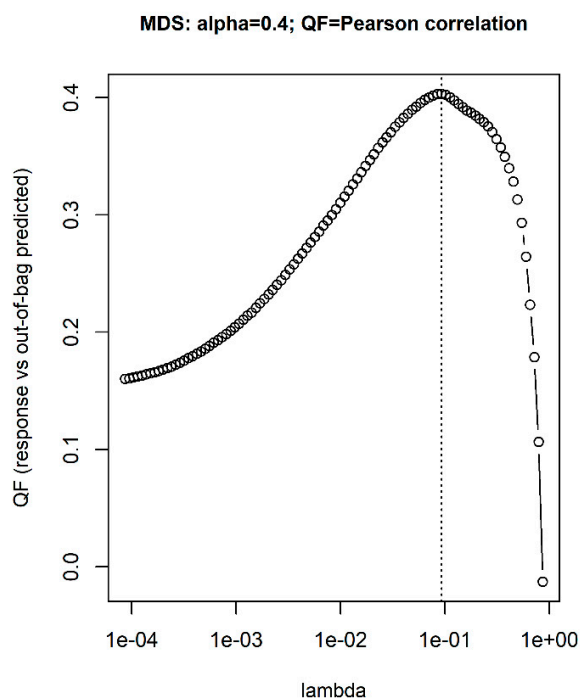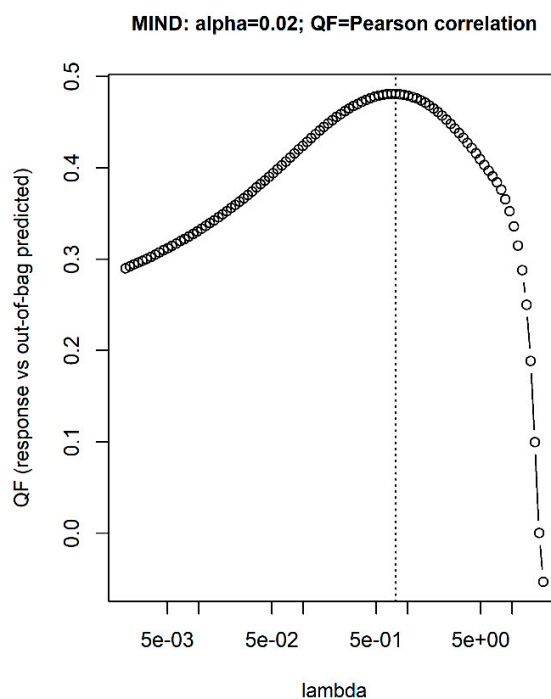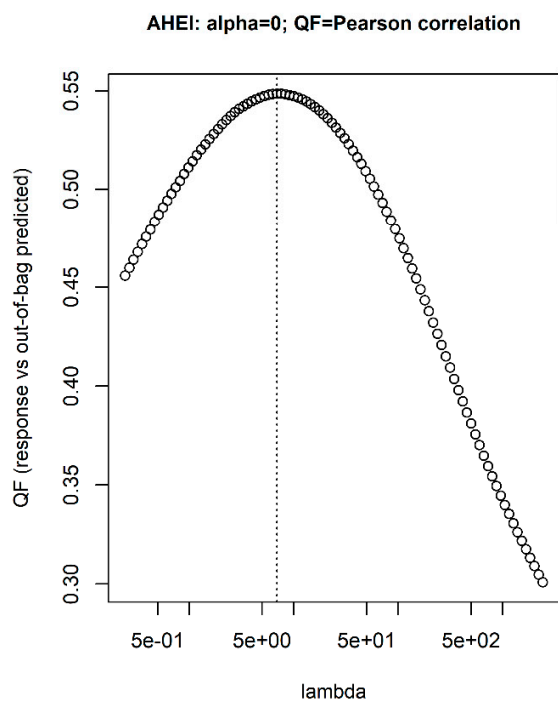

**Figure S2.** Selection of optimal penalty parameter  $\lambda$  by quality function (QF) maximization at the chosen mixing parameter  $\alpha$  values for each diet score response.

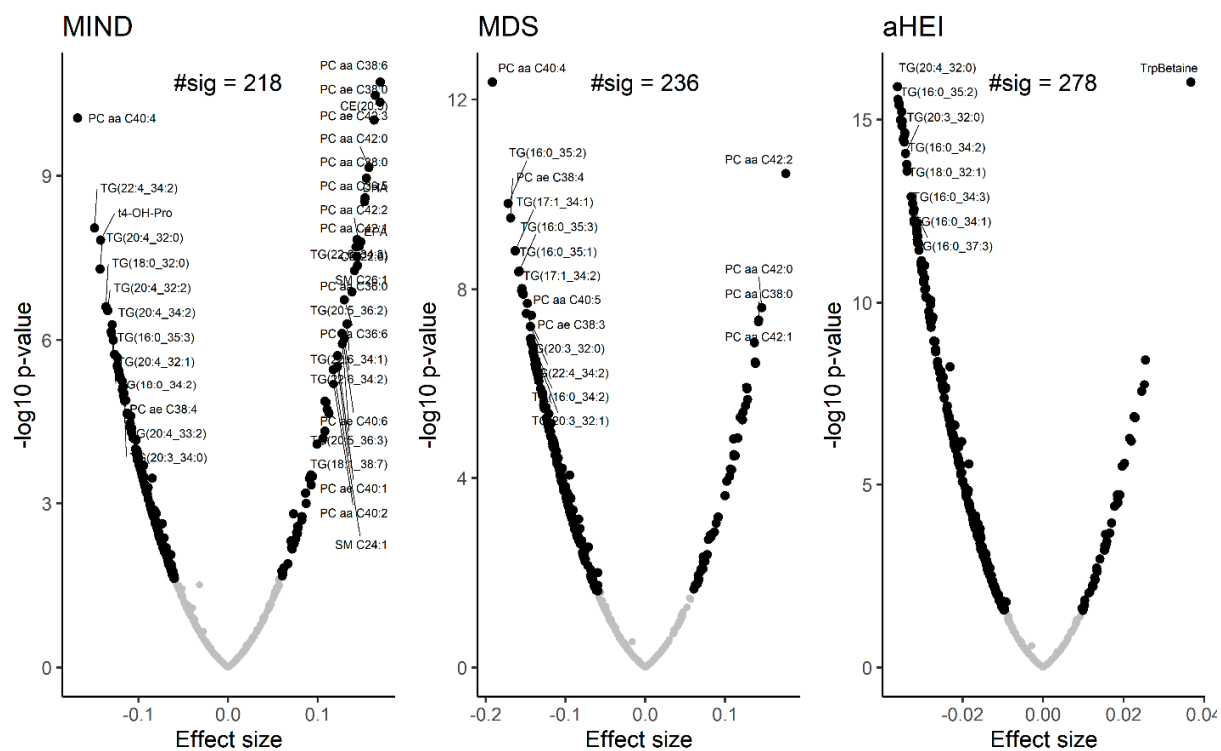

**Figure S3.** Associations between plasma metabolites and dietary patterns.

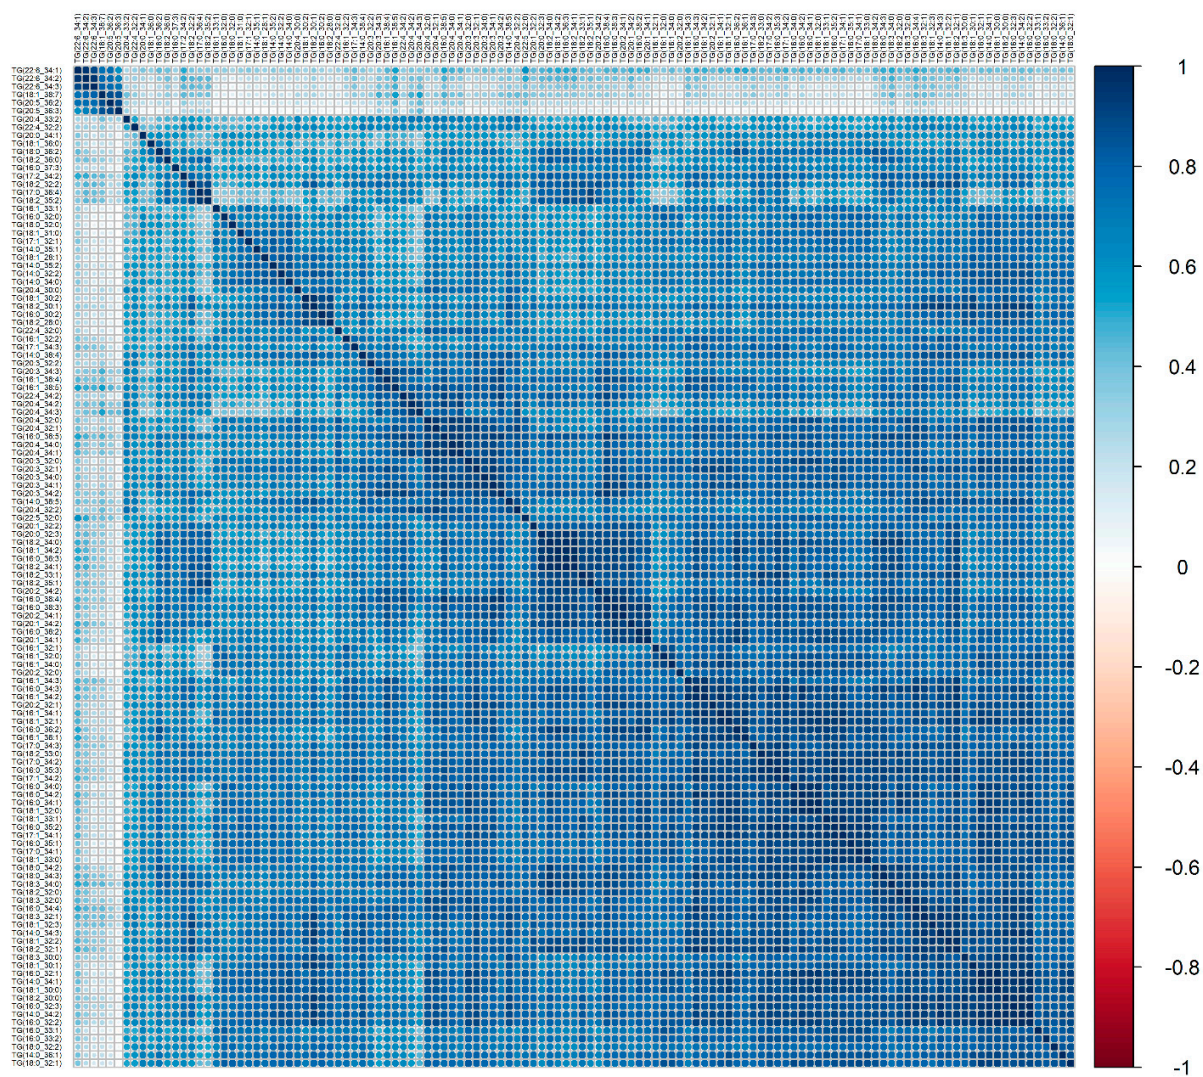

**Figure S4.** Correlation coefficients of diet-associated triglycerides.



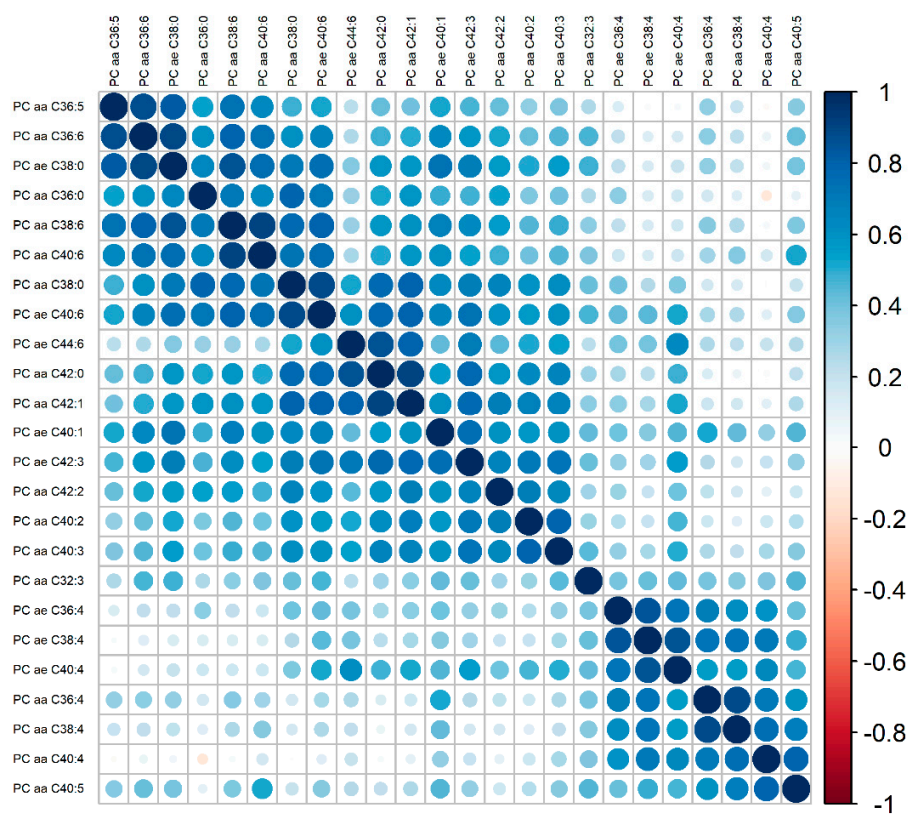

**Figure S5.** Correlation coefficients of diet-associated phosphatidyl-choline.
