# Supplementary material for: Metabolomic Profile of Different Dietary Patterns and Their Association with Frailty Index in Community-Dwelling Older Men and Women
Source: Nutrients. 2022 May 27;14(11):2237. doi: 10.3390/nu14112237 (PMC9182888; doi:10.3390/nu14112237)
Supplement: Supplementary file 1 [file nutrients-14-02237-s001.zip › Table S3&Table S4.xlsx]

## Sheet: TableS3
Table S3. List of plasma metabolites measured and percent observation less than limit of detection (LOD).
Metabolite	Analyte Name	Analyte Class	Percent <LOD
C0	Carnitine	Acylcarnitines	0
C10	Decanoylcarnitine	Acylcarnitines	9.6
C10:1	Decenoylcarnitine	Acylcarnitines	99.2
C10:2	Decadienoyl-carnitine	Acylcarnitines	94.3
C12	Dodecanoyl-carnitine	Acylcarnitines	76.6
C12-DC	Dodecanedioyl-carnitine	Acylcarnitines	100
C12:1	Dodecenoyl-carnitine	Acylcarnitines	91.1
C14	Tetradecanoyl-carnitine	Acylcarnitines	96.5
C14:1	Tetradecenoyl-carnitine	Acylcarnitines	16.3
C14:1-OH	Hydroxytetradec-enoylcarnitine	Acylcarnitines	94.6
C14:2	Tetradecadienoyl-carnitine	Acylcarnitines	88.3
C14:2-OH	Hydroxytetradeca-dienoylcarnitine	Acylcarnitines	95.2
C16	Hexadecanoyl-carnitine	Acylcarnitines	85.9
C16-OH	Hydroxyhexa-decanoylcarnitine	Acylcarnitines	100
C16:1	Hexadecenoyl-carnitine	Acylcarnitines	88.9
C16:1-OH	Hydroxyhexadec-enoylcarnitine	Acylcarnitines	99.6
C16:2	Hexadecadienoyl-carnitine	Acylcarnitines	96.9
C16:2-OH	Hydroxyhexadeca-dienoylcarnitine	Acylcarnitines	97.6
C18	Octadecanoyl-carnitine	Acylcarnitines	72
C18:1	Octadecenoyl-carnitine	Acylcarnitines	30.9
C18:1-OH	Hydroxyoctadec-enoylcarnitine	Acylcarnitines	98.9
C18:2	Octadecadienoyl-carnitine	Acylcarnitines	3.3
C2	Acetylcarnitine	Acylcarnitines	0
C3	Propionylcarnitine	Acylcarnitines	0
C3-DC (C4-OH)	Malonylcarnitine (Hydroxybutyrylcarnitine)	Acylcarnitines	76.9
C3-OH	Hydroxypropionyl-carnitine	Acylcarnitines	99.3
C3:1	Propenoylcarnitine	Acylcarnitines	96.4
C4	Butyrylcarnitine	Acylcarnitines	1.5
C4:1	Butenylcarnitine	Acylcarnitines	99.5
C5	Valerylcarnitine	Acylcarnitines	2.8
C5-DC (C6-OH)	Glutarylcarnitine (Hydroxyhexanoylcarnitine)	Acylcarnitines	98.9
C5-M-DC	Methylglutaryl-carnitine	Acylcarnitines	99.7
C5-OH (C3-DC-M)	Hydroxyvaleryl-carnitine (Methylmalonylcarnitine)	Acylcarnitines	90.9
C5:1	Tiglylcarnitine	Acylcarnitines	97.6
C5:1-DC	Glutaconylcarnitine	Acylcarnitines	97.8
C6 (C4:1-DC)	Hexanoylcarnitine (Fumarylcarnitine)	Acylcarnitines	92.3
C6:1	Hexenoylcarnitine	Acylcarnitines	99.7
C7-DC	Pimelylcarnitine	Acylcarnitines	93.3
C8	Octanoylcarnitine	Acylcarnitines	76.6
C9	Nonanoylcarnitine	Acylcarnitines	93
Trigonelline	Trigonelline	Alkaloids	2.5
TMAO	Trimethylamine N-oxide	Amine Oxides	0
1-Met-His	1-Methylhistidine	Amino Acid Related	0
3-Met-His	3-Methylhistidine	Amino Acid Related	0
5-AVA	5-Aminovaleric acid	Amino Acid Related	51.8
AABA	alpha-Amino-butyric acid	Amino Acid Related	0
Ac-Orn	Acetylornithine	Amino Acid Related	99.8
ADMA	Asymmetric dimethylarginine	Amino Acid Related	0
alpha-AAA	alpha-Aminoadipic acid	Amino Acid Related	0.6
Anserine	L-Anserine	Amino Acid Related	91.7
BABA	beta-Aminobutyric acid	Amino Acid Related	79.3
Betaine	Betaine	Amino Acid Related	0
c4-OH-Pro	cis-4-Hydroxyproline	Amino Acid Related	99.7
Carnosine	Carnosine	Amino Acid Related	99.8
Cit	Citrulline	Amino Acid Related	0
Creatinine	Creatinine	Amino Acid Related	0
Cystine	Cystine	Amino Acid Related	0
DOPA	Dihydroxy-phenylalanine	Amino Acid Related	93.5
HArg	Homoarginine	Amino Acid Related	0
HCys	Homocysteine	Amino Acid Related	0
Kynurenine	Kynurenine	Amino Acid Related	0
Met-SO	Methionine-Sulfoxide	Amino Acid Related	0
Nitro-Tyr	Nitrotyrosine	Amino Acid Related	99.9
Orn	Ornithine	Amino Acid Related	0
PAG	Phenylacetylglycine	Amino Acid Related	99.9
PheAlaBetaine	Phenylalanine betaine	Amino Acid Related	93.4
ProBetaine	Proline betaine	Amino Acid Related	0
Sarcosine	Sarcosine	Amino Acid Related	0
SDMA	Symmetric dimethylarginine	Amino Acid Related	0
t4-OH-Pro	trans-4-Hydroxyproline	Amino Acid Related	0
Taurine	Taurine	Amino Acid Related	0
TrpBetaine	Tryptophan betaine	Amino Acid Related	1
Ala	Alanine	Amino Acids	0
Arg	Arginine	Amino Acids	0
Asn	Asparagine	Amino Acids	0
Asp	Aspartic Acid	Amino Acids	0
Cys	Cysteine	Amino Acids	0
Gln	Glutamine	Amino Acids	0
Glu	Glutamic Acid	Amino Acids	0
Gly	Glycine	Amino Acids	0
His	Histidine	Amino Acids	0
Ile	Isoleucine	Amino Acids	0
Leu	Leucine	Amino Acids	0
Lys	Lysine	Amino Acids	0
Met	Methionine	Amino Acids	0
Phe	Phenylalanine	Amino Acids	0
Pro	Proline	Amino Acids	0
Ser	Serine	Amino Acids	0
Thr	Threonine	Amino Acids	0
Trp	Tryptophan	Amino Acids	0
Tyr	Tyrosine	Amino Acids	0
Val	Valine	Amino Acids	0
CA	Cholic Acid	Bile Acids	7.8
CDCA	Chenodeoxycholic acid	Bile Acids	26
DCA	Deoxycholic acid	Bile Acids	1.1
GCA	Glycocholic acid	Bile Acids	0.1
GCDCA	Glycochenodeoxy-cholic acid	Bile Acids	0
GDCA	Glycodeoxycholic acid	Bile Acids	0.8
GLCA	Glycolithocholic acid	Bile Acids	23.8
GLCAS	Glycolithocholic acid sulfate	Bile Acids	0.1
GUDCA	Glycoursodeoxy-cholic acid	Bile Acids	2.1
TCA	Taurocholic acid	Bile Acids	13.2
TCDCA	Taurochenodeoxy-cholic acid	Bile Acids	4.1
TDCA	Taurodeoxycholic acid	Bile Acids	5.4
TLCA	Taurolithocholic acid	Bile Acids	65.6
TMCA	Tauromuricholic acids	Bile Acids	27.9
beta-Ala	beta-Alanine	Biogenic Amines	0
Dopamine	Dopamine	Biogenic Amines	100
GABA	gamma-Amino-butyric acid	Biogenic Amines	0
Histamine	Histamine	Biogenic Amines	100
PEA	Phenylethylamine	Biogenic Amines	100
Putrescine	Putrescine	Biogenic Amines	7.4
Serotonin	Serotonin	Biogenic Amines	46.2
Spermidine	Spermidine	Biogenic Amines	87
Spermine	Spermine	Biogenic Amines	87.7
H1	Hexose	Carbohydrates and Related	0
AconAcid	Aconitic acid	Carboxylic Acids	0.1
DiCA(12:0)	Dodecanedioic acid	Carboxylic Acids	99.1
DiCA(14:0)	Tetradecanedioic acid	Carboxylic Acids	97.3
HipAcid	Hippuric acid	Carboxylic Acids	1.3
Lac	Lactic acid	Carboxylic Acids	0
OH-GlutAcid	Hydroxyglutaric acid	Carboxylic Acids	99.7
Suc	Succinic acid	Carboxylic Acids	99.7
Cer(d16:1/18:0)	Ceramide (d16:1/18:0)	Ceramides	34.7
Cer(d16:1/20:0)	Ceramide (d16:1/20:0)	Ceramides	0.5
Cer(d16:1/22:0)	Ceramide (d16:1/22:0)	Ceramides	0
Cer(d16:1/23:0)	Ceramide (d16:1/23:0)	Ceramides	0
Cer(d16:1/24:0)	Ceramide (d16:1/24:0)	Ceramides	0
Cer(d18:1/14:0)	Ceramide (d18:1/14:0)	Ceramides	37.9
Cer(d18:1/16:0)	Ceramide (d18:1/16:0)	Ceramides	0
Cer(d18:1/18:0(OH))	Ceramide (d18:1/18:0(OH))	Ceramides	91.1
Cer(d18:1/18:0)	Ceramide (d18:1/18:0)	Ceramides	0
Cer(d18:1/18:1)	Ceramide (d18:1/18:1)	Ceramides	85.6
Cer(d18:1/20:0(OH))	Ceramide (d18:1/20:0(OH))	Ceramides	60.6
Cer(d18:1/20:0)	Ceramide (d18:1/20:0)	Ceramides	0
Cer(d18:1/22:0)	Ceramide (d18:1/22:0)	Ceramides	0
Cer(d18:1/23:0)	Ceramide (d18:1/23:0)	Ceramides	0
Cer(d18:1/24:0)	Ceramide (d18:1/24:0)	Ceramides	0
Cer(d18:1/24:1)	Ceramide (d18:1/24:1)	Ceramides	0
Cer(d18:1/25:0)	Ceramide (d18:1/25:0)	Ceramides	0
Cer(d18:1/26:0)	Ceramide (d18:1/26:0)	Ceramides	0.7
Cer(d18:1/26:1)	Ceramide (d18:1/26:1)	Ceramides	3.6
Cer(d18:2/14:0)	Ceramide (d18:2/14:0)	Ceramides	90.4
Cer(d18:2/16:0)	Ceramide (d18:2/16:0)	Ceramides	0
Cer(d18:2/18:0)	Ceramide (d18:2/18:0)	Ceramides	0
Cer(d18:2/18:1)	Ceramide (d18:2/18:1)	Ceramides	88.2
Cer(d18:2/20:0)	Ceramide (d18:2/20:0)	Ceramides	0.3
Cer(d18:2/22:0)	Ceramide (d18:2/22:0)	Ceramides	0
Cer(d18:2/23:0)	Ceramide (d18:2/23:0)	Ceramides	0
Cer(d18:2/24:0)	Ceramide (d18:2/24:0)	Ceramides	0
Cer(d18:2/24:1)	Ceramide (d18:2/24:1)	Ceramides	0
CE(14:0)	Cholesteryl ester 14:0	Cholesteryl Esters	0
CE(14:1)	Cholesteryl ester 14:1	Cholesteryl Esters	85.6
CE(15:0)	Cholesteryl ester 15:0	Cholesteryl Esters	0
CE(15:1)	Cholesteryl ester 15:1	Cholesteryl Esters	89.5
CE(16:0)	Cholesteryl ester 16:0	Cholesteryl Esters	0
CE(16:1)	Cholesteryl ester 16:1	Cholesteryl Esters	0.1
CE(17:0)	Cholesteryl ester 17:0	Cholesteryl Esters	0.2
CE(17:1)	Cholesteryl ester 17:1	Cholesteryl Esters	2.1
CE(18:0)	Cholesteryl ester 18:0	Cholesteryl Esters	0
CE(18:1)	Cholesteryl ester 18:1	Cholesteryl Esters	0
CE(18:2)	Cholesteryl ester 18:2	Cholesteryl Esters	0
CE(18:3)	Cholesteryl ester 18:3	Cholesteryl Esters	0
CE(20:0)	Cholesteryl ester 20:0	Cholesteryl Esters	91.8
CE(20:1)	Cholesteryl ester 20:1	Cholesteryl Esters	81
CE(20:3)	Cholesteryl ester 20:3	Cholesteryl Esters	0
CE(20:4)	Cholesteryl ester 20:4	Cholesteryl Esters	0
CE(20:5)	Cholesteryl ester 20:5	Cholesteryl Esters	0
CE(22:0)	Cholesteryl ester 22:0	Cholesteryl Esters	93.8
CE(22:1)	Cholesteryl ester 22:1	Cholesteryl Esters	91.2
CE(22:2)	Cholesteryl ester 22:2	Cholesteryl Esters	84.5
CE(22:5)	Cholesteryl ester 22:5	Cholesteryl Esters	0.1
CE(22:6)	Cholesteryl ester 22:6	Cholesteryl Esters	0
p-Cresol-SO4	p-Cresol sulfate	Cresols	0
DG-O(14:0_18:2)	Diacylglyceride O-(14:0_18:2)	Diglycerides	100
DG-O(16:0_18:1)	Diacylglyceride O-(16:0_18:1)	Diglycerides	98.8
DG(14:0_14:0)	Diacylglyceride (14:0_14:0)	Diglycerides	98.3
DG(14:0_18:1)	Diacylglyceride (14:0_18:1)	Diglycerides	93.5
DG(14:0_18:2)	Diacylglyceride (14:0_18:2)	Diglycerides	87.1
DG(14:0_20:0)	Diacylglyceride (14:0_20:0)	Diglycerides	99
DG(14:1_18:1)	Diacylglyceride (14:1_18:1)	Diglycerides	89.5
DG(14:1_20:2)	Diacylglyceride (14:1_20:2)	Diglycerides	97.1
DG(16:0_16:0)	Diacylglyceride (16:0_16:0)	Diglycerides	100
DG(16:0_16:1)	Diacylglyceride (16:0_16:1)	Diglycerides	78.3
DG(16:0_18:1)	Diacylglyceride (16:0_18:1)	Diglycerides	7.3
DG(16:0_18:2)	Diacylglyceride (16:0_18:2)	Diglycerides	0.1
DG(16:0_20:0)	Diacylglyceride (16:0_20:0)	Diglycerides	100
DG(16:0_20:3)	Diacylglyceride (16:0_20:3)	Diglycerides	96.2
DG(16:0_20:4)	Diacylglyceride (16:0_20:4)	Diglycerides	98.9
DG(16:1_18:0)	Diacylglyceride (16:1_18:0)	Diglycerides	93.3
DG(16:1_18:1)	Diacylglyceride (16:1_18:1)	Diglycerides	46.6
DG(16:1_18:2)	Diacylglyceride (16:1_18:2)	Diglycerides	1.2
DG(16:1_20:0)	Diacylglyceride (16:1_20:0)	Diglycerides	99.3
DG(17:0_17:1)	Diacylglyceride (17:0_17:1)	Diglycerides	98.3
DG(17:0_18:1)	Diacylglyceride (17:0_18:1)	Diglycerides	3.9
DG(18:0_20:0)	Diacylglyceride (18:0_20:0)	Diglycerides	99.2
DG(18:0_20:4)	Diacylglyceride (18:0_20:4)	Diglycerides	96.9
DG(18:1_18:1)	Diacylglyceride (18:1_18:1)	Diglycerides	0.1
DG(18:1_18:2)	Diacylglyceride (18:1_18:2)	Diglycerides	0
DG(18:1_18:3)	Diacylglyceride (18:1_18:3)	Diglycerides	78.6
DG(18:1_18:4)	Diacylglyceride (18:1_18:4)	Diglycerides	99
DG(18:1_20:0)	Diacylglyceride (18:1_20:0)	Diglycerides	91.2
DG(18:1_20:1)	Diacylglyceride (18:1_20:1)	Diglycerides	89.7
DG(18:1_20:2)	Diacylglyceride (18:1_20:2)	Diglycerides	84.8
DG(18:1_20:3)	Diacylglyceride (18:1_20:3)	Diglycerides	86.1
DG(18:1_20:4)	Diacylglyceride (18:1_20:4)	Diglycerides	90.8
DG(18:1_22:5)	Diacylglyceride (18:1_22:5)	Diglycerides	97.1
DG(18:1_22:6)	Diacylglyceride (18:1_22:6)	Diglycerides	95.7
DG(18:2_18:2)	Diacylglyceride (18:2_18:2)	Diglycerides	0
DG(18:2_18:3)	Diacylglyceride (18:2_18:3)	Diglycerides	24.8
DG(18:2_18:4)	Diacylglyceride (18:2_18:4)	Diglycerides	95.5
DG(18:2_20:0)	Diacylglyceride (18:2_20:0)	Diglycerides	91.1
DG(18:2_20:4)	Diacylglyceride (18:2_20:4)	Diglycerides	88.9
DG(18:3_18:3)	Diacylglyceride (18:3_18:3)	Diglycerides	99.5
DG(18:3_20:2)	Diacylglyceride (18:3_20:2)	Diglycerides	99.9
DG(21:0_22:6)	Diacylglyceride (21:0_22:6)	Diglycerides	99.3
DG(22:1_22:2)	Diacylglyceride (22:1_22:2)	Diglycerides	97.5
Hex2Cer(d18:1/14:0)	Dihexosylceramide (d18:1/14:0)	Dihexosylceramides	0.3
Hex2Cer(d18:1/16:0)	Dihexosylceramide (d18:1/16:0)	Dihexosylceramides	0
Hex2Cer(d18:1/18:0)	Dihexosylceramide (d18:1/18:0)	Dihexosylceramides	0
Hex2Cer(d18:1/20:0)	Dihexosylceramide (d18:1/20:0)	Dihexosylceramides	0
Hex2Cer(d18:1/22:0)	Dihexosylceramide (d18:1/22:0)	Dihexosylceramides	0
Hex2Cer(d18:1/24:0)	Dihexosylceramide (d18:1/24:0)	Dihexosylceramides	0
Hex2Cer(d18:1/24:1)	Dihexosylceramide (d18:1/24:1)	Dihexosylceramides	0
Hex2Cer(d18:1/26:0)	Dihexosylceramide (d18:1/26:0)	Dihexosylceramides	87.9
Hex2Cer(d18:1/26:1)	Dihexosylceramide (d18:1/26:1)	Dihexosylceramides	82.5
Cer(d18:0/18:0(OH))	Dihydroceramide (d18:0/18:0(OH))	Dihydroceramides	99.2
Cer(d18:0/18:0)	Dihydroceramide (d18:0/18:0)	Dihydroceramides	90.9
Cer(d18:0/20:0)	Dihydroceramide (d18:0/20:0)	Dihydroceramides	93.1
Cer(d18:0/22:0)	Dihydroceramide (d18:0/22:0)	Dihydroceramides	81.4
Cer(d18:0/24:0)	Dihydroceramide (d18:0/24:0)	Dihydroceramides	0.2
Cer(d18:0/24:1)	Dihydroceramide (d18:0/24:1)	Dihydroceramides	3.2
Cer(d18:0/26:1(OH))	Dihydroceramide (d18:0/26:1(OH))	Dihydroceramides	97
Cer(d18:0/26:1)	Dihydroceramide (d18:0/26:1)	Dihydroceramides	98.2
AA	Arachidonic acid	Fatty Acids	39.3
DHA	Docosahexaenoic acid	Fatty Acids	0.2
EPA	Eicosapentaenoic acid	Fatty Acids	2.9
FA(12:0)	Dodecanoic acid	Fatty Acids	98.9
FA(14:0)	Myristic acid	Fatty Acids	98.3
FA(16:0)	Palmitic acid	Fatty Acids	100
FA(18:0)	Stearic acid	Fatty Acids	100
FA(18:1)	Octadecenoic acid	Fatty Acids	0.6
FA(18:2)	Octadecadienoate	Fatty Acids	0
FA(20:1)	Eicosenoic acid	Fatty Acids	4.4
FA(20:2)	Eicosadienoic acid	Fatty Acids	1.3
FA(20:3)	Eicosatrienoic acid	Fatty Acids	7.3
HexCer(d16:1/22:0)	Hexosylceramide (d16:1/22:0)	Hexosylceramides	2.4
HexCer(d16:1/24:0)	Hexosylceramide (d16:1/24:0)	Hexosylceramides	10.1
HexCer(d18:1/14:0)	Hexosylceramide (d18:1/14:0)	Hexosylceramides	83.5
HexCer(d18:1/16:0)	Hexosylceramide (d18:1/16:0)	Hexosylceramides	0
HexCer(d18:1/18:0)	Hexosylceramide (d18:1/18:0)	Hexosylceramides	0
HexCer(d18:1/18:1)	Hexosylceramide (d18:1/18:1)	Hexosylceramides	0.3
HexCer(d18:1/20:0)	Hexosylceramide (d18:1/20:0)	Hexosylceramides	0
HexCer(d18:1/22:0)	Hexosylceramide (d18:1/22:0)	Hexosylceramides	0
HexCer(d18:1/23:0)	Hexosylceramide (d18:1/23:0)	Hexosylceramides	0
HexCer(d18:1/24:0)	Hexosylceramide (d18:1/24:0)	Hexosylceramides	0
HexCer(d18:1/24:1)	Hexosylceramide (d18:1/24:1)	Hexosylceramides	0
HexCer(d18:1/26:0)	Hexosylceramide (d18:1/26:0)	Hexosylceramides	35.1
HexCer(d18:1/26:1)	Hexosylceramide (d18:1/26:1)	Hexosylceramides	71.5
HexCer(d18:2/16:0)	Hexosylceramide (d18:2/16:0)	Hexosylceramides	86
HexCer(d18:2/18:0)	Hexosylceramide (d18:2/18:0)	Hexosylceramides	9
HexCer(d18:2/20:0)	Hexosylceramide (d18:2/20:0)	Hexosylceramides	86.7
HexCer(d18:2/22:0)	Hexosylceramide (d18:2/22:0)	Hexosylceramides	0
HexCer(d18:2/23:0)	Hexosylceramide (d18:2/23:0)	Hexosylceramides	0.1
HexCer(d18:2/24:0)	Hexosylceramide (d18:2/24:0)	Hexosylceramides	0.8
AbsAcid	Abscisic acid	Hormones and Related	99.6
Cortisol	Cortisol	Hormones and Related	0.4
Cortisone	Cortisone	Hormones and Related	65.8
DHEAS	Dehydroepiandro-sterone sulfate	Hormones and Related	1.3
3-IAA	Indoleacetic acid	Indoles and Derivatives	0
3-IPA	Indolepropionic acid	Indoles and Derivatives	1.1
Ind-SO4	Indoxyl sulfate	Indoles and Derivatives	0.1
Indole	Indole	Indoles and Derivatives	100
lysoPC a C14:0	Lyso-Phosphatidyl-choline a C14:0	Lysophosphatidyl-cholines	92.4
lysoPC a C16:0	Lyso-Phosphatidyl-choline a C16:0	Lysophosphatidyl-cholines	0
lysoPC a C16:1	Lyso-Phosphatidyl-choline a C16:1	Lysophosphatidyl-cholines	0
lysoPC a C17:0	Lyso-Phosphatidyl-choline a C17:0	Lysophosphatidyl-cholines	0
lysoPC a C18:0	Lyso-Phosphatidyl-choline a C18:0	Lysophosphatidyl-cholines	0
lysoPC a C18:1	Lyso-Phosphatidyl-choline a C18:1	Lysophosphatidyl-cholines	0
lysoPC a C18:2	Lyso-Phosphatidyl-choline a C18:2	Lysophosphatidyl-cholines	0
lysoPC a C20:3	Lyso-Phosphatidyl-choline a C20:3	Lysophosphatidyl-cholines	0
lysoPC a C20:4	Lyso-Phosphatidyl-choline a C20:4	Lysophosphatidyl-cholines	0
lysoPC a C24:0	Lyso-Phosphatidyl-choline a C24:0	Lysophosphatidyl-cholines	0.4
lysoPC a C26:0	Lyso-Phosphatidyl-choline a C26:0	Lysophosphatidyl-cholines	21.5
lysoPC a C26:1	Lyso-Phosphatidyl-choline a C26:1	Lysophosphatidyl-cholines	1.6
lysoPC a C28:0	Lyso-Phosphatidyl-choline a C28:0	Lysophosphatidyl-cholines	48.1
lysoPC a C28:1	Lyso-Phosphatidyl-choline a C28:1	Lysophosphatidyl-cholines	0
Hypoxanthine	Hypoxanthine	Nucleobases and Related	19.1
Xanthine	Xanthine	Nucleobases and Related	40.9
PC aa C24:0	Phosphatidylcholine aa C24:0	Phosphatidyl-cholines	75.9
PC aa C26:0	Phosphatidylcholine aa C26:0	Phosphatidyl-cholines	93.9
PC aa C28:1	Phosphatidylcholine aa C28:1	Phosphatidyl-cholines	0
PC aa C30:0	Phosphatidylcholine aa C30:0	Phosphatidyl-cholines	0
PC aa C32:0	Phosphatidylcholine aa C32:0	Phosphatidyl-cholines	0
PC aa C32:1	Phosphatidylcholine aa C32:1	Phosphatidyl-cholines	0
PC aa C32:2	Phosphatidylcholine aa C32:2	Phosphatidyl-cholines	1.8
PC aa C32:3	Phosphatidylcholine aa C32:3	Phosphatidyl-cholines	0
PC aa C34:1	Phosphatidylcholine aa C34:1	Phosphatidyl-cholines	0
PC aa C34:2	Phosphatidylcholine aa C34:2	Phosphatidyl-cholines	0
PC aa C34:3	Phosphatidylcholine aa C34:3	Phosphatidyl-cholines	0
PC aa C34:4	Phosphatidylcholine aa C34:4	Phosphatidyl-cholines	0
PC aa C36:0	Phosphatidylcholine aa C36:0	Phosphatidyl-cholines	1.3
PC aa C36:1	Phosphatidylcholine aa C36:1	Phosphatidyl-cholines	0
PC aa C36:2	Phosphatidylcholine aa C36:2	Phosphatidyl-cholines	0
PC aa C36:3	Phosphatidylcholine aa C36:3	Phosphatidyl-cholines	0
PC aa C36:4	Phosphatidylcholine aa C36:4	Phosphatidyl-cholines	0
PC aa C36:5	Phosphatidylcholine aa C36:5	Phosphatidyl-cholines	0
PC aa C36:6	Phosphatidylcholine aa C36:6	Phosphatidyl-cholines	0
PC aa C38:0	Phosphatidylcholine aa C38:0	Phosphatidyl-cholines	0
PC aa C38:3	Phosphatidylcholine aa C38:3	Phosphatidyl-cholines	0
PC aa C38:4	Phosphatidylcholine aa C38:4	Phosphatidyl-cholines	0
PC aa C38:5	Phosphatidylcholine aa C38:5	Phosphatidyl-cholines	0
PC aa C38:6	Phosphatidylcholine aa C38:6	Phosphatidyl-cholines	0
PC aa C40:1	Phosphatidylcholine aa C40:1	Phosphatidyl-cholines	85.1
PC aa C40:2	Phosphatidylcholine aa C40:2	Phosphatidyl-cholines	0
PC aa C40:3	Phosphatidylcholine aa C40:3	Phosphatidyl-cholines	0
PC aa C40:4	Phosphatidylcholine aa C40:4	Phosphatidyl-cholines	0
PC aa C40:5	Phosphatidylcholine aa C40:5	Phosphatidyl-cholines	0
PC aa C40:6	Phosphatidylcholine aa C40:6	Phosphatidyl-cholines	0
PC aa C42:0	Phosphatidylcholine aa C42:0	Phosphatidyl-cholines	0
PC aa C42:1	Phosphatidylcholine aa C42:1	Phosphatidyl-cholines	0
PC aa C42:2	Phosphatidylcholine aa C42:2	Phosphatidyl-cholines	0.9
PC aa C42:4	Phosphatidylcholine aa C42:4	Phosphatidyl-cholines	0
PC aa C42:5	Phosphatidylcholine aa C42:5	Phosphatidyl-cholines	0
PC aa C42:6	Phosphatidylcholine aa C42:6	Phosphatidyl-cholines	0.2
PC ae C30:0	Phosphatidylcholine ae C30:0	Phosphatidyl-cholines	0.6
PC ae C30:1	Phosphatidylcholine ae C30:1	Phosphatidyl-cholines	54.2
PC ae C30:2	Phosphatidylcholine ae C30:2	Phosphatidyl-cholines	0
PC ae C32:1	Phosphatidylcholine ae C32:1	Phosphatidyl-cholines	0
PC ae C32:2	Phosphatidylcholine ae C32:2	Phosphatidyl-cholines	0
PC ae C34:0	Phosphatidylcholine ae C34:0	Phosphatidyl-cholines	0
PC ae C34:1	Phosphatidylcholine ae C34:1	Phosphatidyl-cholines	0
PC ae C34:2	Phosphatidylcholine ae C34:2	Phosphatidyl-cholines	0
PC ae C34:3	Phosphatidylcholine ae C34:3	Phosphatidyl-cholines	0
PC ae C36:0	Phosphatidylcholine ae C36:0	Phosphatidyl-cholines	0
PC ae C36:1	Phosphatidylcholine ae C36:1	Phosphatidyl-cholines	0
PC ae C36:2	Phosphatidylcholine ae C36:2	Phosphatidyl-cholines	0
PC ae C36:3	Phosphatidylcholine ae C36:3	Phosphatidyl-cholines	0
PC ae C36:4	Phosphatidylcholine ae C36:4	Phosphatidyl-cholines	0
PC ae C36:5	Phosphatidylcholine ae C36:5	Phosphatidyl-cholines	0
PC ae C38:0	Phosphatidylcholine ae C38:0	Phosphatidyl-cholines	0
PC ae C38:1	Phosphatidylcholine ae C38:1	Phosphatidyl-cholines	10.9
PC ae C38:2	Phosphatidylcholine ae C38:2	Phosphatidyl-cholines	0
PC ae C38:3	Phosphatidylcholine ae C38:3	Phosphatidyl-cholines	0
PC ae C38:4	Phosphatidylcholine ae C38:4	Phosphatidyl-cholines	0
PC ae C38:5	Phosphatidylcholine ae C38:5	Phosphatidyl-cholines	0
PC ae C38:6	Phosphatidylcholine ae C38:6	Phosphatidyl-cholines	0
PC ae C40:1	Phosphatidylcholine ae C40:1	Phosphatidyl-cholines	0
PC ae C40:2	Phosphatidylcholine ae C40:2	Phosphatidyl-cholines	0
PC ae C40:3	Phosphatidylcholine ae C40:3	Phosphatidyl-cholines	0
PC ae C40:4	Phosphatidylcholine ae C40:4	Phosphatidyl-cholines	0
PC ae C40:5	Phosphatidylcholine ae C40:5	Phosphatidyl-cholines	0
PC ae C40:6	Phosphatidylcholine ae C40:6	Phosphatidyl-cholines	0
PC ae C42:0	Phosphatidylcholine ae C42:0	Phosphatidyl-cholines	95.4
PC ae C42:1	Phosphatidylcholine ae C42:1	Phosphatidyl-cholines	0
PC ae C42:2	Phosphatidylcholine ae C42:2	Phosphatidyl-cholines	0
PC ae C42:3	Phosphatidylcholine ae C42:3	Phosphatidyl-cholines	0
PC ae C42:4	Phosphatidylcholine ae C42:4	Phosphatidyl-cholines	0
PC ae C42:5	Phosphatidylcholine ae C42:5	Phosphatidyl-cholines	0
PC ae C44:3	Phosphatidylcholine ae C44:3	Phosphatidyl-cholines	0
PC ae C44:4	Phosphatidylcholine ae C44:4	Phosphatidyl-cholines	6.8
PC ae C44:5	Phosphatidylcholine ae C44:5	Phosphatidyl-cholines	0
PC ae C44:6	Phosphatidylcholine ae C44:6	Phosphatidyl-cholines	0
SM (OH) C14:1	Hydroxysphingo-myelin C14:1	Sphingomyelins	0
SM (OH) C16:1	Hydroxysphingo-myelin C16:1	Sphingomyelins	0
SM (OH) C22:1	Hydroxysphingo-myelin C22:1	Sphingomyelins	0
SM (OH) C22:2	Hydroxysphingo-myelin C22:2	Sphingomyelins	0
SM (OH) C24:1	Hydroxysphingo-myelin C24:1	Sphingomyelins	0
SM C16:0	Sphingomyelin C16:0	Sphingomyelins	0
SM C16:1	Sphingomyelin C16:1	Sphingomyelins	0
SM C18:0	Sphingomyelin C18:0	Sphingomyelins	0
SM C18:1	Sphingomyelin C18:1	Sphingomyelins	0
SM C20:2	Sphingomyelin C20:2	Sphingomyelins	0
SM C24:0	Sphingomyelin C24:0	Sphingomyelins	0
SM C24:1	Sphingomyelin C24:1	Sphingomyelins	0
SM C26:0	Sphingomyelin C26:0	Sphingomyelins	0.1
SM C26:1	Sphingomyelin C26:1	Sphingomyelins	0
TG(14:0_32:2)	Triacylglyceride (14:0_32:2)	Triglycerides	15.6
TG(14:0_34:0)	Triacylglyceride (14:0_34:0)	Triglycerides	20
TG(14:0_34:1)	Triacylglyceride (14:0_34:1)	Triglycerides	0.3
TG(14:0_34:2)	Triacylglyceride (14:0_34:2)	Triglycerides	0
TG(14:0_34:3)	Triacylglyceride (14:0_34:3)	Triglycerides	0.2
TG(14:0_35:1)	Triacylglyceride (14:0_35:1)	Triglycerides	21.7
TG(14:0_35:2)	Triacylglyceride (14:0_35:2)	Triglycerides	21.8
TG(14:0_36:1)	Triacylglyceride (14:0_36:1)	Triglycerides	4.1
TG(14:0_36:2)	Triacylglyceride (14:0_36:2)	Triglycerides	0
TG(14:0_36:3)	Triacylglyceride (14:0_36:3)	Triglycerides	0
TG(14:0_36:4)	Triacylglyceride (14:0_36:4)	Triglycerides	0
TG(14:0_38:4)	Triacylglyceride (14:0_38:4)	Triglycerides	3.2
TG(14:0_38:5)	Triacylglyceride (14:0_38:5)	Triglycerides	1
TG(16:0_28:1)	Triacylglyceride (16:0_28:1)	Triglycerides	50.2
TG(16:0_28:2)	Triacylglyceride (16:0_28:2)	Triglycerides	40.3
TG(16:0_30:2)	Triacylglyceride (16:0_30:2)	Triglycerides	5.9
TG(16:0_32:0)	Triacylglyceride (16:0_32:0)	Triglycerides	5.7
TG(16:0_32:1)	Triacylglyceride (16:0_32:1)	Triglycerides	0.2
TG(16:0_32:2)	Triacylglyceride (16:0_32:2)	Triglycerides	0
TG(16:0_32:3)	Triacylglyceride (16:0_32:3)	Triglycerides	0.1
TG(16:0_33:1)	Triacylglyceride (16:0_33:1)	Triglycerides	3.3
TG(16:0_33:2)	Triacylglyceride (16:0_33:2)	Triglycerides	2.8
TG(16:0_34:0)	Triacylglyceride (16:0_34:0)	Triglycerides	0.5
TG(16:0_34:1)	Triacylglyceride (16:0_34:1)	Triglycerides	0
TG(16:0_34:2)	Triacylglyceride (16:0_34:2)	Triglycerides	0
TG(16:0_34:3)	Triacylglyceride (16:0_34:3)	Triglycerides	0
TG(16:0_34:4)	Triacylglyceride (16:0_34:4)	Triglycerides	0
TG(16:0_35:1)	Triacylglyceride (16:0_35:1)	Triglycerides	1.8
TG(16:0_35:2)	Triacylglyceride (16:0_35:2)	Triglycerides	0.1
TG(16:0_35:3)	Triacylglyceride (16:0_35:3)	Triglycerides	0
TG(16:0_36:2)	Triacylglyceride (16:0_36:2)	Triglycerides	0
TG(16:0_36:3)	Triacylglyceride (16:0_36:3)	Triglycerides	0
TG(16:0_36:4)	Triacylglyceride (16:0_36:4)	Triglycerides	0
TG(16:0_36:5)	Triacylglyceride (16:0_36:5)	Triglycerides	0
TG(16:0_36:6)	Triacylglyceride (16:0_36:6)	Triglycerides	0.2
TG(16:0_37:3)	Triacylglyceride (16:0_37:3)	Triglycerides	11.4
TG(16:0_38:1)	Triacylglyceride (16:0_38:1)	Triglycerides	14.4
TG(16:0_38:2)	Triacylglyceride (16:0_38:2)	Triglycerides	0.2
TG(16:0_38:3)	Triacylglyceride (16:0_38:3)	Triglycerides	0
TG(16:0_38:4)	Triacylglyceride (16:0_38:4)	Triglycerides	0
TG(16:0_38:5)	Triacylglyceride (16:0_38:5)	Triglycerides	0
TG(16:0_38:6)	Triacylglyceride (16:0_38:6)	Triglycerides	0
TG(16:0_38:7)	Triacylglyceride (16:0_38:7)	Triglycerides	4.3
TG(16:0_40:6)	Triacylglyceride (16:0_40:6)	Triglycerides	0
TG(16:0_40:7)	Triacylglyceride (16:0_40:7)	Triglycerides	0.1
TG(16:0_40:8)	Triacylglyceride (16:0_40:8)	Triglycerides	0
TG(16:1_28:0)	Triacylglyceride (16:1_28:0)	Triglycerides	59.1
TG(16:1_30:1)	Triacylglyceride (16:1_30:1)	Triglycerides	31.9
TG(16:1_32:0)	Triacylglyceride (16:1_32:0)	Triglycerides	4.5
TG(16:1_32:1)	Triacylglyceride (16:1_32:1)	Triglycerides	6.2
TG(16:1_32:2)	Triacylglyceride (16:1_32:2)	Triglycerides	3
TG(16:1_33:1)	Triacylglyceride (16:1_33:1)	Triglycerides	14.2
TG(16:1_34:0)	Triacylglyceride (16:1_34:0)	Triglycerides	3.1
TG(16:1_34:1)	Triacylglyceride (16:1_34:1)	Triglycerides	0
TG(16:1_34:2)	Triacylglyceride (16:1_34:2)	Triglycerides	0
TG(16:1_34:3)	Triacylglyceride (16:1_34:3)	Triglycerides	0
TG(16:1_36:1)	Triacylglyceride (16:1_36:1)	Triglycerides	0
TG(16:1_36:2)	Triacylglyceride (16:1_36:2)	Triglycerides	0
TG(16:1_36:3)	Triacylglyceride (16:1_36:3)	Triglycerides	0
TG(16:1_36:4)	Triacylglyceride (16:1_36:4)	Triglycerides	0
TG(16:1_36:5)	Triacylglyceride (16:1_36:5)	Triglycerides	0
TG(16:1_38:3)	Triacylglyceride (16:1_38:3)	Triglycerides	0.1
TG(16:1_38:4)	Triacylglyceride (16:1_38:4)	Triglycerides	0
TG(16:1_38:5)	Triacylglyceride (16:1_38:5)	Triglycerides	0
TG(17:0_32:1)	Triacylglyceride (17:0_32:1)	Triglycerides	32.7
TG(17:0_34:1)	Triacylglyceride (17:0_34:1)	Triglycerides	2.1
TG(17:0_34:2)	Triacylglyceride (17:0_34:2)	Triglycerides	0.1
TG(17:0_34:3)	Triacylglyceride (17:0_34:3)	Triglycerides	0.8
TG(17:0_36:3)	Triacylglyceride (17:0_36:3)	Triglycerides	0
TG(17:0_36:4)	Triacylglyceride (17:0_36:4)	Triglycerides	0
TG(17:1_32:1)	Triacylglyceride (17:1_32:1)	Triglycerides	23.1
TG(17:1_34:1)	Triacylglyceride (17:1_34:1)	Triglycerides	0.3
TG(17:1_34:2)	Triacylglyceride (17:1_34:2)	Triglycerides	0.2
TG(17:1_34:3)	Triacylglyceride (17:1_34:3)	Triglycerides	3.7
TG(17:1_36:3)	Triacylglyceride (17:1_36:3)	Triglycerides	0
TG(17:1_36:4)	Triacylglyceride (17:1_36:4)	Triglycerides	0
TG(17:1_36:5)	Triacylglyceride (17:1_36:5)	Triglycerides	5.3
TG(17:1_38:5)	Triacylglyceride (17:1_38:5)	Triglycerides	84.9
TG(17:1_38:6)	Triacylglyceride (17:1_38:6)	Triglycerides	83.8
TG(17:1_38:7)	Triacylglyceride (17:1_38:7)	Triglycerides	85.6
TG(17:2_34:2)	Triacylglyceride (17:2_34:2)	Triglycerides	0.3
TG(17:2_34:3)	Triacylglyceride (17:2_34:3)	Triglycerides	11.3
TG(17:2_36:2)	Triacylglyceride (17:2_36:2)	Triglycerides	0.3
TG(17:2_36:3)	Triacylglyceride (17:2_36:3)	Triglycerides	0.1
TG(17:2_36:4)	Triacylglyceride (17:2_36:4)	Triglycerides	0.1
TG(17:2_38:5)	Triacylglyceride (17:2_38:5)	Triglycerides	3.6
TG(17:2_38:6)	Triacylglyceride (17:2_38:6)	Triglycerides	5.2
TG(17:2_38:7)	Triacylglyceride (17:2_38:7)	Triglycerides	36.3
TG(18:0_30:0)	Triacylglyceride (18:0_30:0)	Triglycerides	42.6
TG(18:0_30:1)	Triacylglyceride (18:0_30:1)	Triglycerides	40.8
TG(18:0_32:0)	Triacylglyceride (18:0_32:0)	Triglycerides	17
TG(18:0_32:1)	Triacylglyceride (18:0_32:1)	Triglycerides	2.5
TG(18:0_32:2)	Triacylglyceride (18:0_32:2)	Triglycerides	8.1
TG(18:0_34:2)	Triacylglyceride (18:0_34:2)	Triglycerides	0
TG(18:0_34:3)	Triacylglyceride (18:0_34:3)	Triglycerides	0
TG(18:0_36:1)	Triacylglyceride (18:0_36:1)	Triglycerides	80.6
TG(18:0_36:2)	Triacylglyceride (18:0_36:2)	Triglycerides	0.7
TG(18:0_36:3)	Triacylglyceride (18:0_36:3)	Triglycerides	0
TG(18:0_36:4)	Triacylglyceride (18:0_36:4)	Triglycerides	0
TG(18:0_36:5)	Triacylglyceride (18:0_36:5)	Triglycerides	0
TG(18:0_38:6)	Triacylglyceride (18:0_38:6)	Triglycerides	0
TG(18:0_38:7)	Triacylglyceride (18:0_38:7)	Triglycerides	5.2
TG(18:1_26:0)	Triacylglyceride (18:1_26:0)	Triglycerides	51.8
TG(18:1_28:1)	Triacylglyceride (18:1_28:1)	Triglycerides	26.6
TG(18:1_30:0)	Triacylglyceride (18:1_30:0)	Triglycerides	0.2
TG(18:1_30:1)	Triacylglyceride (18:1_30:1)	Triglycerides	0.4
TG(18:1_30:2)	Triacylglyceride (18:1_30:2)	Triglycerides	0.1
TG(18:1_31:0)	Triacylglyceride (18:1_31:0)	Triglycerides	29.9
TG(18:1_32:0)	Triacylglyceride (18:1_32:0)	Triglycerides	0
TG(18:1_32:1)	Triacylglyceride (18:1_32:1)	Triglycerides	0
TG(18:1_32:2)	Triacylglyceride (18:1_32:2)	Triglycerides	0
TG(18:1_32:3)	Triacylglyceride (18:1_32:3)	Triglycerides	0
TG(18:1_33:0)	Triacylglyceride (18:1_33:0)	Triglycerides	0.6
TG(18:1_33:1)	Triacylglyceride (18:1_33:1)	Triglycerides	0
TG(18:1_33:2)	Triacylglyceride (18:1_33:2)	Triglycerides	0
TG(18:1_33:3)	Triacylglyceride (18:1_33:3)	Triglycerides	0.2
TG(18:1_34:1)	Triacylglyceride (18:1_34:1)	Triglycerides	0
TG(18:1_34:2)	Triacylglyceride (18:1_34:2)	Triglycerides	0
TG(18:1_34:3)	Triacylglyceride (18:1_34:3)	Triglycerides	0
TG(18:1_34:4)	Triacylglyceride (18:1_34:4)	Triglycerides	0
TG(18:1_35:2)	Triacylglyceride (18:1_35:2)	Triglycerides	0
TG(18:1_35:3)	Triacylglyceride (18:1_35:3)	Triglycerides	0
TG(18:1_36:0)	Triacylglyceride (18:1_36:0)	Triglycerides	25.5
TG(18:1_36:1)	Triacylglyceride (18:1_36:1)	Triglycerides	0
TG(18:1_36:2)	Triacylglyceride (18:1_36:2)	Triglycerides	0
TG(18:1_36:3)	Triacylglyceride (18:1_36:3)	Triglycerides	0
TG(18:1_36:4)	Triacylglyceride (18:1_36:4)	Triglycerides	0
TG(18:1_36:5)	Triacylglyceride (18:1_36:5)	Triglycerides	0
TG(18:1_36:6)	Triacylglyceride (18:1_36:6)	Triglycerides	0
TG(18:1_38:5)	Triacylglyceride (18:1_38:5)	Triglycerides	0
TG(18:1_38:6)	Triacylglyceride (18:1_38:6)	Triglycerides	0
TG(18:1_38:7)	Triacylglyceride (18:1_38:7)	Triglycerides	2.4
TG(18:2_28:0)	Triacylglyceride (18:2_28:0)	Triglycerides	7.5
TG(18:2_30:0)	Triacylglyceride (18:2_30:0)	Triglycerides	0
TG(18:2_30:1)	Triacylglyceride (18:2_30:1)	Triglycerides	0.1
TG(18:2_31:0)	Triacylglyceride (18:2_31:0)	Triglycerides	79.4
TG(18:2_32:0)	Triacylglyceride (18:2_32:0)	Triglycerides	0
TG(18:2_32:1)	Triacylglyceride (18:2_32:1)	Triglycerides	0
TG(18:2_32:2)	Triacylglyceride (18:2_32:2)	Triglycerides	0
TG(18:2_33:0)	Triacylglyceride (18:2_33:0)	Triglycerides	0.1
TG(18:2_33:1)	Triacylglyceride (18:2_33:1)	Triglycerides	0
TG(18:2_33:2)	Triacylglyceride (18:2_33:2)	Triglycerides	0.1
TG(18:2_34:0)	Triacylglyceride (18:2_34:0)	Triglycerides	0
TG(18:2_34:1)	Triacylglyceride (18:2_34:1)	Triglycerides	0
TG(18:2_34:2)	Triacylglyceride (18:2_34:2)	Triglycerides	0
TG(18:2_34:3)	Triacylglyceride (18:2_34:3)	Triglycerides	0
TG(18:2_34:4)	Triacylglyceride (18:2_34:4)	Triglycerides	0
TG(18:2_35:1)	Triacylglyceride (18:2_35:1)	Triglycerides	0
TG(18:2_35:2)	Triacylglyceride (18:2_35:2)	Triglycerides	0
TG(18:2_35:3)	Triacylglyceride (18:2_35:3)	Triglycerides	0
TG(18:2_36:0)	Triacylglyceride (18:2_36:0)	Triglycerides	2.9
TG(18:2_36:1)	Triacylglyceride (18:2_36:1)	Triglycerides	0
TG(18:2_36:2)	Triacylglyceride (18:2_36:2)	Triglycerides	0
TG(18:2_36:3)	Triacylglyceride (18:2_36:3)	Triglycerides	0
TG(18:2_36:4)	Triacylglyceride (18:2_36:4)	Triglycerides	0
TG(18:2_36:5)	Triacylglyceride (18:2_36:5)	Triglycerides	0
TG(18:2_38:4)	Triacylglyceride (18:2_38:4)	Triglycerides	0
TG(18:2_38:5)	Triacylglyceride (18:2_38:5)	Triglycerides	0
TG(18:2_38:6)	Triacylglyceride (18:2_38:6)	Triglycerides	0
TG(18:3_30:0)	Triacylglyceride (18:3_30:0)	Triglycerides	1.5
TG(18:3_32:0)	Triacylglyceride (18:3_32:0)	Triglycerides	0
TG(18:3_32:1)	Triacylglyceride (18:3_32:1)	Triglycerides	0
TG(18:3_33:2)	Triacylglyceride (18:3_33:2)	Triglycerides	73.8
TG(18:3_34:0)	Triacylglyceride (18:3_34:0)	Triglycerides	0
TG(18:3_34:1)	Triacylglyceride (18:3_34:1)	Triglycerides	0
TG(18:3_34:2)	Triacylglyceride (18:3_34:2)	Triglycerides	0
TG(18:3_34:3)	Triacylglyceride (18:3_34:3)	Triglycerides	0
TG(18:3_35:2)	Triacylglyceride (18:3_35:2)	Triglycerides	0.1
TG(18:3_36:1)	Triacylglyceride (18:3_36:1)	Triglycerides	0
TG(18:3_36:2)	Triacylglyceride (18:3_36:2)	Triglycerides	0
TG(18:3_36:3)	Triacylglyceride (18:3_36:3)	Triglycerides	0
TG(18:3_36:4)	Triacylglyceride (18:3_36:4)	Triglycerides	0
TG(18:3_38:5)	Triacylglyceride (18:3_38:5)	Triglycerides	0
TG(18:3_38:6)	Triacylglyceride (18:3_38:6)	Triglycerides	0.7
TG(20:0_32:3)	Triacylglyceride (20:0_32:3)	Triglycerides	0.3
TG(20:0_32:4)	Triacylglyceride (20:0_32:4)	Triglycerides	0.1
TG(20:0_34:1)	Triacylglyceride (20:0_34:1)	Triglycerides	9.6
TG(20:1_24:3)	Triacylglyceride (20:1_24:3)	Triglycerides	100
TG(20:1_26:1)	Triacylglyceride (20:1_26:1)	Triglycerides	96.8
TG(20:1_30:1)	Triacylglyceride (20:1_30:1)	Triglycerides	51.8
TG(20:1_32:1)	Triacylglyceride (20:1_32:1)	Triglycerides	14.7
TG(20:1_32:2)	Triacylglyceride (20:1_32:2)	Triglycerides	0.6
TG(20:1_32:3)	Triacylglyceride (20:1_32:3)	Triglycerides	2.9
TG(20:1_34:0)	Triacylglyceride (20:1_34:0)	Triglycerides	47.2
TG(20:1_34:1)	Triacylglyceride (20:1_34:1)	Triglycerides	0.3
TG(20:1_34:2)	Triacylglyceride (20:1_34:2)	Triglycerides	0
TG(20:1_34:3)	Triacylglyceride (20:1_34:3)	Triglycerides	2.7
TG(20:2_32:0)	Triacylglyceride (20:2_32:0)	Triglycerides	11.6
TG(20:2_32:1)	Triacylglyceride (20:2_32:1)	Triglycerides	0.3
TG(20:2_34:1)	Triacylglyceride (20:2_34:1)	Triglycerides	0
TG(20:2_34:2)	Triacylglyceride (20:2_34:2)	Triglycerides	0
TG(20:2_34:3)	Triacylglyceride (20:2_34:3)	Triglycerides	0.1
TG(20:2_34:4)	Triacylglyceride (20:2_34:4)	Triglycerides	41.9
TG(20:2_36:5)	Triacylglyceride (20:2_36:5)	Triglycerides	27.4
TG(20:3_32:0)	Triacylglyceride (20:3_32:0)	Triglycerides	1
TG(20:3_32:1)	Triacylglyceride (20:3_32:1)	Triglycerides	0.1
TG(20:3_32:2)	Triacylglyceride (20:3_32:2)	Triglycerides	4.7
TG(20:3_34:0)	Triacylglyceride (20:3_34:0)	Triglycerides	0.6
TG(20:3_34:1)	Triacylglyceride (20:3_34:1)	Triglycerides	0
TG(20:3_34:2)	Triacylglyceride (20:3_34:2)	Triglycerides	0
TG(20:3_34:3)	Triacylglyceride (20:3_34:3)	Triglycerides	0
TG(20:3_36:3)	Triacylglyceride (20:3_36:3)	Triglycerides	0
TG(20:3_36:4)	Triacylglyceride (20:3_36:4)	Triglycerides	0
TG(20:3_36:5)	Triacylglyceride (20:3_36:5)	Triglycerides	0.3
TG(20:4_30:0)	Triacylglyceride (20:4_30:0)	Triglycerides	9.3
TG(20:4_32:0)	Triacylglyceride (20:4_32:0)	Triglycerides	0
TG(20:4_32:1)	Triacylglyceride (20:4_32:1)	Triglycerides	0
TG(20:4_32:2)	Triacylglyceride (20:4_32:2)	Triglycerides	0.9
TG(20:4_33:2)	Triacylglyceride (20:4_33:2)	Triglycerides	2.7
TG(20:4_34:0)	Triacylglyceride (20:4_34:0)	Triglycerides	0
TG(20:4_34:1)	Triacylglyceride (20:4_34:1)	Triglycerides	0
TG(20:4_34:2)	Triacylglyceride (20:4_34:2)	Triglycerides	0
TG(20:4_34:3)	Triacylglyceride (20:4_34:3)	Triglycerides	0
TG(20:4_35:3)	Triacylglyceride (20:4_35:3)	Triglycerides	36
TG(20:4_36:2)	Triacylglyceride (20:4_36:2)	Triglycerides	0
TG(20:4_36:3)	Triacylglyceride (20:4_36:3)	Triglycerides	0
TG(20:4_36:4)	Triacylglyceride (20:4_36:4)	Triglycerides	0
TG(20:4_36:5)	Triacylglyceride (20:4_36:5)	Triglycerides	0.2
TG(20:5_34:0)	Triacylglyceride (20:5_34:0)	Triglycerides	0.8
TG(20:5_34:1)	Triacylglyceride (20:5_34:1)	Triglycerides	0
TG(20:5_34:2)	Triacylglyceride (20:5_34:2)	Triglycerides	0
TG(20:5_36:2)	Triacylglyceride (20:5_36:2)	Triglycerides	0.4
TG(20:5_36:3)	Triacylglyceride (20:5_36:3)	Triglycerides	2.5
TG(22:0_32:4)	Triacylglyceride (22:0_32:4)	Triglycerides	83.9
TG(22:1_32:5)	Triacylglyceride (22:1_32:5)	Triglycerides	83.2
TG(22:2_32:4)	Triacylglyceride (22:2_32:4)	Triglycerides	85.4
TG(22:3_30:2)	Triacylglyceride (22:3_30:2)	Triglycerides	87.9
TG(22:4_32:0)	Triacylglyceride (22:4_32:0)	Triglycerides	7.3
TG(22:4_32:2)	Triacylglyceride (22:4_32:2)	Triglycerides	11
TG(22:4_34:2)	Triacylglyceride (22:4_34:2)	Triglycerides	0
TG(22:5_32:0)	Triacylglyceride (22:5_32:0)	Triglycerides	2.6
TG(22:5_32:1)	Triacylglyceride (22:5_32:1)	Triglycerides	0
TG(22:5_34:1)	Triacylglyceride (22:5_34:1)	Triglycerides	0
TG(22:5_34:2)	Triacylglyceride (22:5_34:2)	Triglycerides	0
TG(22:5_34:3)	Triacylglyceride (22:5_34:3)	Triglycerides	0
TG(22:6_32:0)	Triacylglyceride (22:6_32:0)	Triglycerides	0.2
TG(22:6_32:1)	Triacylglyceride (22:6_32:1)	Triglycerides	0
TG(22:6_34:1)	Triacylglyceride (22:6_34:1)	Triglycerides	0
TG(22:6_34:2)	Triacylglyceride (22:6_34:2)	Triglycerides	0
TG(22:6_34:3)	Triacylglyceride (22:6_34:3)	Triglycerides	0
Hex3Cer(d18:1/16:0)	Trihexosylceramide (d18:1/16:0)	Trihexosylceramides	0
Hex3Cer(d18:1/18:0)	Trihexosylceramide (d18:1/18:0)	Trihexosylceramides	4.9
Hex3Cer(d18:1/24:1)	Trihexosylceramide (d18:1/24:1)	Trihexosylceramides	0
Hex3Cer(d18:1/26:1)	Trihexosylceramide (d18:1/26:1)	Trihexosylceramides	15.9
Choline	Choline	Vitamins and Cofactors	0

## Sheet: TableS4
Table S4. Associations between 466 plasma metabolites and dietary patterns in the Baltimore Longitudinal Study on Aging.
Metabolite	AnalyteName	AnalyteClass	MDS			MIND			AHEI
			beta	se	fdr_p	beta	se	fdr_p	beta	se	fdr_p
1-Met-His	1-Methylhistidine	Amino Acid Related	-0.0804772	0.0311409	0.0221497	-0.0546749	0.0314038	0.139059	-0.0748334	0.0310204	0.0285867
3-IAA	Indoleacetic acid	Indoles and Derivatives	-0.0897871	0.0362168	0.0285894	-0.0726407	0.0364893	0.0902135	-0.114633	0.0359681	0.00328185
3-IPA	Indolepropionic acid	Indoles and Derivatives	0.151582	0.0363285	0.000155753	0.149458	0.036568	0.000334433	0.204117	0.0358408	1.04807e-07
3-Met-His	3-Methylhistidine	Amino Acid Related	0.0481318	0.0364694	0.271037	0.128261	0.0364529	0.00201531	0.0803346	0.0362372	0.0452706
AABA	alpha-Amino-butyric acid	Amino Acid Related	0.0344549	0.0364033	0.445655	0.0989424	0.0364806	0.0189381	0.0308749	0.0362469	0.478844
AconAcid	Aconitic acid	Carboxylic Acids	-0.0356962	0.0357444	0.421339	-0.0733088	0.0358934	0.0807973	-0.00589339	0.0356086	0.907539
ADMA	Asymmetric dimethylarginine	Amino Acid Related	-0.0158383	0.0358206	0.735872	-0.0313968	0.0360284	0.489967	-0.0632361	0.0355971	0.115049
Ala	Alanine	Amino Acids	-0.04053	0.0367295	0.368104	-0.098881	0.0368181	0.0200181	-0.0956906	0.036439	0.0166086
alpha-AAA	alpha-Aminoadipic acid	Amino Acid Related	-0.0281558	0.0349646	0.523045	0.00713196	0.0351933	0.873187	-0.0610565	0.0347579	0.119689
Arg	Arginine	Amino Acids	0.0189131	0.036077	0.686047	0.0217744	0.0362972	0.642503	0.00482033	0.035924	0.929184
Asn	Asparagine	Amino Acids	0.10438	0.0362921	0.0101112	0.0440439	0.0366708	0.321979	0.100272	0.0361453	0.0112312
Asp	Aspartic Acid	Amino Acids	0.0390355	0.0367228	0.389162	0.0257469	0.0369638	0.586582	0.0139391	0.0365837	0.772954
beta-Ala	beta-Alanine	Biogenic Amines	-0.0348268	0.0337411	0.401626	-0.0710398	0.0338785	0.0729451	-0.0314531	0.0335966	0.435415
Betaine	Betaine	Amino Acid Related	0.0844383	0.0356542	0.0373399	-0.000102098	0.0359993	0.997738	0.0257013	0.03561	0.558088
C0	Carnitine	Acylcarnitines	-0.0509293	0.0360667	0.237652	-0.0328026	0.0363154	0.476006	-0.0812969	0.0358376	0.0405223
C10	Decanoylcarnitine	Acylcarnitines	-0.00695157	0.0364119	0.888689	-0.0151321	0.036633	0.745348	-0.00376849	0.0362523	0.945643
C14:1	Tetradecenoyl-carnitine	Acylcarnitines	-0.0315451	0.0364435	0.487379	0.0115779	0.0366828	0.798635	0.0120188	0.0362977	0.800788
C18:2	Octadecadienoyl-carnitine	Acylcarnitines	-0.00365706	0.0368367	0.93908	-0.0644453	0.0369937	0.139059	0.0134091	0.0366718	0.781833
C2	Acetylcarnitine	Acylcarnitines	-0.0542311	0.0360582	0.203387	-0.00853897	0.0363302	0.854585	-0.046975	0.0359119	0.264427
C3	Propionylcarnitine	Acylcarnitines	-0.0846507	0.0355233	0.036212	-0.0627545	0.0358	0.136822	-0.123198	0.035224	0.00121346
C4	Butyrylcarnitine	Acylcarnitines	-0.0661757	0.0353156	0.10906	-0.0306228	0.0355944	0.49209	-0.0783103	0.0351283	0.0441821
C5	Valerylcarnitine	Acylcarnitines	-0.118724	0.0351303	0.00225939	-0.088239	0.035461	0.0323144	-0.111557	0.035003	0.00328185
CA	Cholic Acid	Bile Acids	-0.0220715	0.0359592	0.634896	-0.0118333	0.0361867	0.791294	-0.0272085	0.0357964	0.533248
CDCA	Chenodeoxycholic acid	Bile Acids	-0.065782	0.0362822	0.122514	-0.0694684	0.0364979	0.105223	-0.119595	0.0359488	0.00207782
CE(14:0)	Cholesteryl ester 14:0	Cholesteryl Esters	-0.135034	0.0359859	0.000678356	-0.050649	0.0364808	0.247849	-0.149218	0.0357543	0.000100742
CE(15:0)	Cholesteryl ester 15:0	Cholesteryl Esters	-0.15378	0.0357604	0.00010265	-0.0126267	0.0363913	0.783819	-0.0883085	0.0358765	0.0254713
CE(16:0)	Cholesteryl ester 16:0	Cholesteryl Esters	-0.0628345	0.0360409	0.137849	0.0046738	0.0363313	0.919374	-0.0825573	0.0358317	0.0374835
CE(16:1)	Cholesteryl ester 16:1	Cholesteryl Esters	-0.158717	0.0350579	4.78731e-05	-0.0882008	0.0355864	0.0328627	-0.226536	0.0344286	7.62389e-10
CE(17:0)	Cholesteryl ester 17:0	Cholesteryl Esters	-0.173549	0.036067	1.57164e-05	-0.04688	0.0367731	0.290691	-0.14149	0.0360791	0.000266449
CE(17:1)	Cholesteryl ester 17:1	Cholesteryl Esters	-0.146388	0.0361407	0.000246557	-0.0902318	0.0365954	0.0337001	-0.173186	0.0358293	6.19011e-06
CE(18:0)	Cholesteryl ester 18:0	Cholesteryl Esters	-0.120846	0.0361747	0.00257966	-0.0317365	0.0366332	0.49209	-0.113724	0.0360422	0.00360529
CE(18:1)	Cholesteryl ester 18:1	Cholesteryl Esters	-0.0404778	0.0361609	0.360895	0.0608606	0.0363484	0.156631	-0.0288104	0.0360156	0.509215
CE(18:2)	Cholesteryl ester 18:2	Cholesteryl Esters	0.00716535	0.0357135	0.884701	0.0496531	0.0358914	0.24931	0.0317506	0.0355395	0.456089
CE(18:3)	Cholesteryl ester 18:3	Cholesteryl Esters	-0.0258634	0.035171	0.561062	0.0230015	0.0353901	0.61331	-0.078813	0.034917	0.0414236
CE(20:3)	Cholesteryl ester 20:3	Cholesteryl Esters	-0.149944	0.0355338	0.000136588	-0.0769617	0.0360458	0.06756	-0.15475	0.0353481	4.58353e-05
CE(20:4)	Cholesteryl ester 20:4	Cholesteryl Esters	-0.0928981	0.0351909	0.0190367	-0.0763032	0.035459	0.0652946	-0.128606	0.0348933	0.000630274
CE(20:5)	Cholesteryl ester 20:5	Cholesteryl Esters	0.164463	0.0354349	3.14187e-05	0.234821	0.0351631	7.03504e-09	0.150095	0.0353547	7.5745e-05
CE(22:5)	Cholesteryl ester 22:5	Cholesteryl Esters	-0.162701	0.0351821	3.34338e-05	-0.114484	0.0356396	0.00518901	-0.196857	0.0348032	1.22541e-07
CE(22:6)	Cholesteryl ester 22:6	Cholesteryl Esters	0.159886	0.0348587	3.92721e-05	0.19755	0.0348383	6.17856e-07	0.143917	0.0347886	0.000116288
Cer(d16:1/20:0)	Ceramide (d16:1/20:0)	Ceramides	-0.079425	0.035613	0.0509904	0.0364217	0.0359204	0.416335	-0.0408092	0.035537	0.332271
Cer(d16:1/22:0)	Ceramide (d16:1/22:0)	Ceramides	-0.0857572	0.0361926	0.0373399	0.00692688	0.0365422	0.881875	0.0104798	0.0361576	0.827035
Cer(d16:1/23:0)	Ceramide (d16:1/23:0)	Ceramides	-0.111539	0.0358419	0.00503831	0.0192833	0.0362738	0.688186	-0.03573	0.0358773	0.405817
Cer(d16:1/24:0)	Ceramide (d16:1/24:0)	Ceramides	-0.0424332	0.0366221	0.343129	0.0552582	0.0368267	0.207801	0.058457	0.0364329	0.159324
Cer(d18:0/24:0)	Dihydroceramide (d18:0/24:0)	Dihydroceramides	0.0085658	0.0361966	0.866943	0.00146141	0.0364207	0.978502	-0.0132224	0.0360355	0.781833
Cer(d18:0/24:1)	Dihydroceramide (d18:0/24:1)	Dihydroceramides	0.00143998	0.0365124	0.981184	0.0660555	0.036663	0.12561	-0.0687454	0.0362704	0.0910268
Cer(d18:1/16:0)	Ceramide (d18:1/16:0)	Ceramides	-0.0111508	0.0357473	0.822221	0.0268391	0.0359571	0.560224	-0.0207072	0.0355847	0.645253
Cer(d18:1/18:0)	Ceramide (d18:1/18:0)	Ceramides	-0.146748	0.0354168	0.000171254	-0.0869133	0.0358838	0.0372171	-0.222805	0.0347557	1.98894e-09
Cer(d18:1/20:0)	Ceramide (d18:1/20:0)	Ceramides	-0.113083	0.0361428	0.00484345	-0.0852902	0.0364627	0.0436456	-0.175992	0.0356645	3.82673e-06
Cer(d18:1/22:0)	Ceramide (d18:1/22:0)	Ceramides	-0.0803836	0.0360623	0.0509904	-0.0839435	0.0362757	0.0459798	-0.0796163	0.0359048	0.0452706
Cer(d18:1/23:0)	Ceramide (d18:1/23:0)	Ceramides	-0.131125	0.035182	0.000743365	-0.0477442	0.0356647	0.266578	-0.128159	0.0350382	0.000694248
Cer(d18:1/24:0)	Ceramide (d18:1/24:0)	Ceramides	-0.0341357	0.0365076	0.451871	-0.00603828	0.0367519	0.89647	-0.00265775	0.0363667	0.964527
Cer(d18:1/24:1)	Ceramide (d18:1/24:1)	Ceramides	-0.0338877	0.0355121	0.444805	0.0560834	0.0356961	0.185996	-0.0550957	0.0353223	0.172511
Cer(d18:1/25:0)	Ceramide (d18:1/25:0)	Ceramides	-0.0308861	0.0348874	0.475163	0.0715576	0.0350281	0.0807973	-0.0286619	0.0347361	0.494421
Cer(d18:1/26:0)	Ceramide (d18:1/26:0)	Ceramides	-0.00999933	0.0358176	0.84354	0.0622686	0.0359726	0.14104	-0.0187467	0.0356555	0.682699
Cer(d18:1/26:1)	Ceramide (d18:1/26:1)	Ceramides	0.0135935	0.0360453	0.777969	0.0658898	0.0361956	0.122805	-0.000259326	0.0358899	0.998522
Cer(d18:2/16:0)	Ceramide (d18:2/16:0)	Ceramides	-0.0404633	0.034957	0.343129	0.0375211	0.0351766	0.388895	-0.0364175	0.0348085	0.376585
Cer(d18:2/18:0)	Ceramide (d18:2/18:0)	Ceramides	-0.0634109	0.0350359	0.122915	-0.0315202	0.0353062	0.480522	-0.117917	0.0347036	0.00166905
Cer(d18:2/20:0)	Ceramide (d18:2/20:0)	Ceramides	-0.0717387	0.0347882	0.0748541	-0.0338802	0.0350749	0.440912	-0.107369	0.0345189	0.0041159
Cer(d18:2/22:0)	Ceramide (d18:2/22:0)	Ceramides	-0.0425347	0.0350285	0.316762	-0.0173848	0.0352713	0.702076	-0.00590487	0.0349059	0.906563
Cer(d18:2/23:0)	Ceramide (d18:2/23:0)	Ceramides	-0.0660906	0.034256	0.0976164	0.0228393	0.0345376	0.606179	-0.0235263	0.0341744	0.576794
Cer(d18:2/24:0)	Ceramide (d18:2/24:0)	Ceramides	-0.00111949	0.0357472	0.9856	0.0446923	0.0359326	0.304887	0.0587243	0.0355293	0.14703
Cer(d18:2/24:1)	Ceramide (d18:2/24:1)	Ceramides	-0.00730886	0.0346158	0.880043	0.082832	0.0347066	0.0401573	0.0245893	0.0344535	0.561116
Choline	Choline	Vitamins and Cofactors	-0.0574561	0.0345039	0.157399	-0.0991463	0.0345993	0.0133606	-0.131958	0.0340938	0.000321669
Cit	Citrulline	Amino Acid Related	0.00248879	0.0338777	0.955813	0.0145295	0.0340825	0.73986	0.0266217	0.0337156	0.515113
Cortisol	Cortisol	Hormones and Related	0.0284323	0.0358855	0.528604	0.0205895	0.0361133	0.660936	0.0378597	0.0357166	0.370576
Creatinine	Creatinine	Amino Acid Related	-0.0217966	0.0203852	0.387588	-0.0441986	0.0204658	0.0644062	-0.0231557	0.0202934	0.334615
Cys	Cysteine	Amino Acids	-0.0278441	0.0356979	0.535625	-0.0577859	0.0358732	0.175952	-0.0838413	0.0354305	0.0321283
Cystine	Cystine	Amino Acid Related	0.00785769	0.0361948	0.879126	-0.0183469	0.0364129	0.698432	-0.0301141	0.0360208	0.488263
DCA	Deoxycholic acid	Bile Acids	-0.0844914	0.036482	0.0418024	-0.120436	0.0365825	0.00409835	-0.150387	0.036053	0.000101023
DG(16:0_18:1)	Diacylglyceride (16:0_18:1)	Diglycerides	-0.151866	0.0363429	0.000153296	-0.13706	0.0366446	0.00103126	-0.203466	0.0358613	1.13791e-07
DG(16:0_18:2)	Diacylglyceride (16:0_18:2)	Diglycerides	-0.129763	0.0361864	0.00116918	-0.136628	0.0363814	0.0010295	-0.189719	0.0356907	6.91252e-07
DG(16:1_18:2)	Diacylglyceride (16:1_18:2)	Diglycerides	-0.137467	0.0363496	0.000618727	-0.104744	0.0367126	0.0137443	-0.20353	0.0357956	1.07598e-07
DG(17:0_18:1)	Diacylglyceride (17:0_18:1)	Diglycerides	-0.162318	0.0359423	4.96679e-05	-0.0573048	0.0365656	0.186827	-0.193676	0.0355845	3.6977e-07
DG(18:1_18:1)	Diacylglyceride (18:1_18:1)	Diglycerides	-0.101976	0.0364827	0.0123753	-0.0455574	0.036851	0.307908	-0.133625	0.0361921	0.000618325
DG(18:1_18:2)	Diacylglyceride (18:1_18:2)	Diglycerides	-0.0743213	0.0362999	0.0769325	-0.0574867	0.0365625	0.185996	-0.113157	0.0360132	0.00375217
DG(18:2_18:2)	Diacylglyceride (18:2_18:2)	Diglycerides	-0.0255723	0.0362351	0.577166	-0.0549065	0.0364178	0.20609	-0.0648331	0.036014	0.109597
DG(18:2_18:3)	Diacylglyceride (18:2_18:3)	Diglycerides	0.0346873	0.0366558	0.445655	-0.00350485	0.036902	0.938454	-0.0125832	0.0365122	0.795317
DHA	Docosahexaenoic acid	Fatty Acids	0.171685	0.0351904	1.20096e-05	0.211821	0.0351408	1.47716e-07	0.1854	0.0349435	7.20894e-07
DHEAS	Dehydroepiandro-sterone sulfate	Hormones and Related	0.0138519	0.034656	0.765001	0.0223221	0.0348639	0.619182	0.0186928	0.0345006	0.671702
EPA	Eicosapentaenoic acid	Fatty Acids	0.141904	0.0360851	0.000363877	0.205094	0.0359322	5.77885e-07	0.154267	0.0358595	6.03018e-05
FA(18:1)	Octadecenoic acid	Fatty Acids	-0.0562056	0.0362176	0.189347	0.0162448	0.0364908	0.729933	-0.00213285	0.0361123	0.96745
FA(18:2)	Octadecadienoate	Fatty Acids	-0.0223365	0.0361276	0.633024	-0.0123895	0.0363561	0.783819	-0.000149094	0.0359772	0.998838
FA(20:1)	Eicosenoic acid	Fatty Acids	0.0266589	0.0367293	0.565189	0.0670997	0.0368914	0.122805	0.0333275	0.0365607	0.44661
FA(20:2)	Eicosadienoic acid	Fatty Acids	-0.0308218	0.0364173	0.496748	0.00528865	0.0366575	0.910729	-0.0157912	0.036269	0.739574
FA(20:3)	Eicosatrienoic acid	Fatty Acids	-0.0493241	0.0362431	0.254852	-0.0140936	0.036505	0.75988	-0.0408835	0.0360964	0.336399
GABA	gamma-Amino-butyric acid	Biogenic Amines	0.0697785	0.0361223	0.0974531	0.0303573	0.0364135	0.506974	0.041553	0.0360171	0.330538
GCA	Glycocholic acid	Bile Acids	-0.00489219	0.0366228	0.919415	-0.0361275	0.0368266	0.432746	-0.00780885	0.036461	0.877548
GCDCA	Glycochenodeoxy-cholic acid	Bile Acids	-0.0407526	0.0363641	0.360895	-0.082931	0.0364991	0.0498981	-0.0497991	0.0361897	0.237476
GDCA	Glycodeoxycholic acid	Bile Acids	-0.0262325	0.0367819	0.573091	-0.0886591	0.0368872	0.0387502	-0.0597796	0.0365707	0.152147
GLCA	Glycolithocholic acid	Bile Acids	-0.0223865	0.0366035	0.635003	-0.0491291	0.0367965	0.266578	-0.0485208	0.0364105	0.254619
GLCAS	Glycolithocholic acid sulfate	Bile Acids	0.0493388	0.0365899	0.259071	0.0270342	0.0368446	0.568183	0.0336347	0.0364509	0.441226
Gln	Glutamine	Amino Acids	0.100747	0.036338	0.0131961	0.0489638	0.0366961	0.266578	0.0412292	0.0363222	0.335985
Glu	Glutamic Acid	Amino Acids	-0.113028	0.0362587	0.00497781	-0.12727	0.0364259	0.00216643	-0.15456	0.0359042	6.03018e-05
Gly	Glycine	Amino Acids	0.0615728	0.0346428	0.129539	0.0120291	0.0349222	0.783819	0.0555363	0.0345025	0.158577
GUDCA	Glycoursodeoxy-cholic acid	Bile Acids	-0.0859836	0.0367265	0.0396141	-0.137895	0.0367571	0.00103126	-0.110814	0.0364801	0.00509835
H1	Hexose	Carbohydrates and Related	-0.0799152	0.0353577	0.0475424	-0.0705029	0.0356016	0.0913147	-0.11402	0.0350834	0.00266833
HArg	Homoarginine	Amino Acid Related	0.0568242	0.0353865	0.172895	0.0656704	0.035586	0.118955	0.0918145	0.0351378	0.0171821
HCys	Homocysteine	Amino Acid Related	-0.0535828	0.0353894	0.20088	-0.0961631	0.0354959	0.0189987	-0.0646892	0.0352099	0.101671
Hex2Cer(d18:1/14:0)	Dihexosylceramide (d18:1/14:0)	Dihexosylceramides	0.00301544	0.0355269	0.948666	0.0713399	0.0356567	0.0884777	0.0415829	0.0353402	0.32096
Hex2Cer(d18:1/16:0)	Dihexosylceramide (d18:1/16:0)	Dihexosylceramides	0.0313028	0.0362937	0.488206	0.0723009	0.0364446	0.0909333	0.0586826	0.0360912	0.154377
Hex2Cer(d18:1/18:0)	Dihexosylceramide (d18:1/18:0)	Dihexosylceramides	-0.0681062	0.0355957	0.10087	-0.0178248	0.0358912	0.700791	-0.0689248	0.0354364	0.0834659
Hex2Cer(d18:1/20:0)	Dihexosylceramide (d18:1/20:0)	Dihexosylceramides	-0.0263865	0.0344007	0.541679	-0.00642466	0.0346245	0.883166	-0.0318793	0.0342433	0.43761
Hex2Cer(d18:1/22:0)	Dihexosylceramide (d18:1/22:0)	Dihexosylceramides	0.0160268	0.0351606	0.731885	0.0245895	0.035371	0.586582	0.0650138	0.0349348	0.0970613
Hex2Cer(d18:1/24:0)	Dihexosylceramide (d18:1/24:0)	Dihexosylceramides	0.0548	0.0364496	0.203387	0.0754966	0.0366286	0.0778885	0.127958	0.0360577	0.00101552
Hex2Cer(d18:1/24:1)	Dihexosylceramide (d18:1/24:1)	Dihexosylceramides	0.0817557	0.035642	0.0441207	0.152945	0.0355706	0.000157032	0.124063	0.0353305	0.00116022
Hex3Cer(d18:1/16:0)	Trihexosylceramide (d18:1/16:0)	Trihexosylceramides	0.0482565	0.0344942	0.242274	0.0779909	0.0346395	0.052397	0.0674136	0.0343017	0.0804556
Hex3Cer(d18:1/18:0)	Trihexosylceramide (d18:1/18:0)	Trihexosylceramides	-0.0163403	0.0356267	0.731356	0.05693	0.0357942	0.182687	0.0202441	0.0354673	0.652295
Hex3Cer(d18:1/24:1)	Trihexosylceramide (d18:1/24:1)	Trihexosylceramides	0.10604	0.0341687	0.00515526	0.149683	0.0341781	0.000114183	0.125631	0.033933	0.000601062
Hex3Cer(d18:1/26:1)	Trihexosylceramide (d18:1/26:1)	Trihexosylceramides	0.0132088	0.0366814	0.78822	0.0149961	0.0369064	0.748892	0.0163616	0.0365183	0.732882
HexCer(d16:1/22:0)	Hexosylceramide (d16:1/22:0)	Hexosylceramides	-0.0096804	0.0362433	0.849632	0.0469198	0.0364304	0.286753	0.0484369	0.0360448	0.250293
HexCer(d16:1/24:0)	Hexosylceramide (d16:1/24:0)	Hexosylceramides	-0.0190191	0.0363194	0.686047	0.0577037	0.0364923	0.184416	0.0441577	0.0361321	0.30164
HexCer(d18:1/16:0)	Hexosylceramide (d18:1/16:0)	Hexosylceramides	-0.004056	0.0360687	0.931192	0.0273749	0.0362781	0.556633	-0.00906936	0.0359088	0.853651
HexCer(d18:1/18:0)	Hexosylceramide (d18:1/18:0)	Hexosylceramides	-0.0404821	0.0362262	0.360944	0.0248552	0.0364671	0.594701	-0.0578105	0.036037	0.159324
HexCer(d18:1/18:1)	Hexosylceramide (d18:1/18:1)	Hexosylceramides	-0.0500668	0.0346838	0.225105	-0.063216	0.0348712	0.123936	-0.115488	0.0343342	0.00187757
HexCer(d18:1/20:0)	Hexosylceramide (d18:1/20:0)	Hexosylceramides	-0.0161866	0.0359806	0.733164	0.0511104	0.0361616	0.238946	-0.00288086	0.0358266	0.960668
HexCer(d18:1/22:0)	Hexosylceramide (d18:1/22:0)	Hexosylceramides	0.00534533	0.0366103	0.911332	-0.000644345	0.0368362	0.990299	0.0356607	0.0364279	0.412022
HexCer(d18:1/23:0)	Hexosylceramide (d18:1/23:0)	Hexosylceramides	-0.0471958	0.0359811	0.273277	0.0258027	0.0362301	0.579086	-0.0442557	0.0358271	0.295812
HexCer(d18:1/24:0)	Hexosylceramide (d18:1/24:0)	Hexosylceramides	0.033973	0.0366788	0.452806	0.0448214	0.0368904	0.316385	0.0467063	0.0364996	0.27636
HexCer(d18:1/24:1)	Hexosylceramide (d18:1/24:1)	Hexosylceramides	0.0571928	0.0354726	0.171222	0.107222	0.0355474	0.00884936	0.0385223	0.0353476	0.356436
HexCer(d18:2/18:0)	Hexosylceramide (d18:2/18:0)	Hexosylceramides	0.0155158	0.0361689	0.744765	0.0694884	0.0363128	0.103196	0.0331768	0.0359948	0.441226
HexCer(d18:2/22:0)	Hexosylceramide (d18:2/22:0)	Hexosylceramides	0.0330974	0.0357379	0.452806	0.0461556	0.0359402	0.287725	0.0685152	0.0355172	0.0854207
HexCer(d18:2/23:0)	Hexosylceramide (d18:2/23:0)	Hexosylceramides	-0.00786678	0.0355241	0.877526	0.0383927	0.0357182	0.386401	0.0260479	0.0353569	0.548635
HexCer(d18:2/24:0)	Hexosylceramide (d18:2/24:0)	Hexosylceramides	0.056367	0.0358066	0.182362	0.08472	0.0359583	0.0425317	0.083073	0.0355832	0.0348363
HipAcid	Hippuric acid	Carboxylic Acids	0.116628	0.0363287	0.00384707	0.120696	0.0365387	0.00397569	0.150862	0.0360081	9.51853e-05
His	Histidine	Amino Acids	0.00921463	0.0368176	0.859622	-0.0180856	0.0370402	0.704058	-0.0298328	0.0366419	0.500664
Hypoxanthine	Hypoxanthine	Nucleobases and Related	0.0328533	0.036562	0.467521	0.0501292	0.036763	0.256486	-0.0414029	0.0363901	0.335473
Ile	Isoleucine	Amino Acids	-0.0328715	0.0338742	0.437224	-0.0575706	0.034042	0.152319	-0.0817914	0.0336208	0.0271428
Ind-SO4	Indoxyl sulfate	Indoles and Derivatives	-0.113796	0.035283	0.00369946	-0.123691	0.0354617	0.00218046	-0.151476	0.0349474	5.3702e-05
Kynurenine	Kynurenine	Amino Acid Related	-0.0746464	0.0335024	0.0509904	-0.0886284	0.0336676	0.0228708	-0.0681411	0.0333714	0.0683176
Lac	Lactic acid	Carboxylic Acids	-0.0221387	0.0365848	0.636821	-0.0776205	0.0367161	0.0702384	-0.0439692	0.036399	0.307171
Leu	Leucine	Amino Acids	-0.0354611	0.034152	0.400808	-0.0517416	0.0343367	0.20609	-0.0727178	0.0339273	0.0537088
Lys	Lysine	Amino Acids	-0.0439222	0.0368303	0.327599	0.00116679	0.0370899	0.982931	-0.0346087	0.0366804	0.431893
lysoPC a C16:0	Lyso-Phosphatidyl-choline a C16:0	Lysophosphatidyl-cholines	-0.0602516	0.0366819	0.163215	-0.0215614	0.0369621	0.652201	-0.0424948	0.0365512	0.326645
lysoPC a C16:1	Lyso-Phosphatidyl-choline a C16:1	Lysophosphatidyl-cholines	-0.156191	0.0358722	8.57972e-05	-0.089805	0.03638	0.0336082	-0.144169	0.0357738	0.000175736
lysoPC a C17:0	Lyso-Phosphatidyl-choline a C17:0	Lysophosphatidyl-cholines	-0.0897137	0.0366219	0.0305951	0.0187734	0.0369794	0.698204	0.00784746	0.0365962	0.877548
lysoPC a C18:0	Lyso-Phosphatidyl-choline a C18:0	Lysophosphatidyl-cholines	-0.0421699	0.0368294	0.349223	-0.0262969	0.0370749	0.579086	-0.000944616	0.0366974	0.98795
lysoPC a C18:1	Lyso-Phosphatidyl-choline a C18:1	Lysophosphatidyl-cholines	-0.00717152	0.0364602	0.885942	0.0449726	0.0366511	0.311846	0.0431495	0.0362685	0.314931
lysoPC a C18:2	Lyso-Phosphatidyl-choline a C18:2	Lysophosphatidyl-cholines	0.0490836	0.0360368	0.254852	0.0543447	0.0362498	0.207801	0.0941336	0.0357653	0.0163904
lysoPC a C20:3	Lyso-Phosphatidyl-choline a C20:3	Lysophosphatidyl-cholines	-0.124721	0.0363219	0.00190631	-0.0581641	0.0367564	0.184416	-0.100986	0.0362522	0.0108899
lysoPC a C20:4	Lyso-Phosphatidyl-choline a C20:4	Lysophosphatidyl-cholines	-0.101429	0.0361425	0.0120784	-0.0919304	0.0363988	0.0297347	-0.0953065	0.0360028	0.0157411
lysoPC a C24:0	Lyso-Phosphatidyl-choline a C24:0	Lysophosphatidyl-cholines	0.0879874	0.036773	0.035588	0.0923956	0.0369876	0.0319622	0.10065	0.0365692	0.0117989
lysoPC a C26:0	Lyso-Phosphatidyl-choline a C26:0	Lysophosphatidyl-cholines	-0.0100337	0.0369441	0.847868	0.0245984	0.0371631	0.606179	-0.0207737	0.0367759	0.655284
lysoPC a C26:1	Lyso-Phosphatidyl-choline a C26:1	Lysophosphatidyl-cholines	-0.0197752	0.0369115	0.683178	-0.00108974	0.0371454	0.982931	-0.0155192	0.0367516	0.747762
lysoPC a C28:1	Lyso-Phosphatidyl-choline a C28:1	Lysophosphatidyl-cholines	-0.0626983	0.0356699	0.134165	0.0140214	0.0359553	0.758519	-0.0494741	0.0355384	0.232674
Met	Methionine	Amino Acids	0.0333224	0.0358532	0.452806	-0.0461679	0.0360565	0.288754	-0.0401	0.0356865	0.340375
Met-SO	Methionine-Sulfoxide	Amino Acid Related	0.0409134	0.0363206	0.358892	-0.00607447	0.0365726	0.89647	-0.068901	0.0361073	0.0889945
Orn	Ornithine	Amino Acid Related	0.00612948	0.0367229	0.904355	-0.00793663	0.0369486	0.865255	0.0153868	0.0365579	0.747762
p-Cresol-SO4	p-Cresol sulfate	Cresols	-0.0417884	0.0359936	0.343129	-0.0408845	0.0362169	0.359103	-0.0489517	0.0358236	0.240945
PC aa C28:1	Phosphatidylcholine aa C28:1	Phosphatidyl-cholines	-0.0619797	0.0348665	0.129539	0.0627222	0.0350803	0.128472	-0.00338828	0.0347813	0.948891
PC aa C30:0	Phosphatidylcholine aa C30:0	Phosphatidyl-cholines	-0.0494592	0.0355059	0.244183	0.0211208	0.03576	0.648124	-0.0674154	0.0353122	0.0889945
PC aa C32:0	Phosphatidylcholine aa C32:0	Phosphatidyl-cholines	-0.0188993	0.0357658	0.685635	0.0405639	0.0359637	0.359103	-0.065953	0.0355382	0.0978672
PC aa C32:1	Phosphatidylcholine aa C32:1	Phosphatidyl-cholines	-0.141871	0.0354538	0.000286117	-0.0700907	0.035942	0.096413	-0.197169	0.034961	1.32689e-07
PC aa C32:2	Phosphatidylcholine aa C32:2	Phosphatidyl-cholines	-0.0217389	0.0363043	0.638546	0.0318316	0.0365187	0.489967	0.0233874	0.0361432	0.601695
PC aa C32:3	Phosphatidylcholine aa C32:3	Phosphatidyl-cholines	-0.12776	0.0323731	0.000355115	-0.117281	0.0326255	0.0015742	-0.187755	0.0318586	3.71076e-08
PC aa C34:1	Phosphatidylcholine aa C34:1	Phosphatidyl-cholines	-0.0747345	0.0359869	0.0725564	0.0188687	0.0362998	0.695938	-0.0974201	0.0357595	0.0127841
PC aa C34:2	Phosphatidylcholine aa C34:2	Phosphatidyl-cholines	-0.0111264	0.035997	0.82265	0.0160133	0.0362164	0.730617	-0.0167355	0.0358359	0.722257
PC aa C34:3	Phosphatidylcholine aa C34:3	Phosphatidyl-cholines	-0.0501634	0.0342623	0.218624	-0.0108169	0.0345173	0.798635	-0.0732309	0.0340589	0.0529983
PC aa C34:4	Phosphatidylcholine aa C34:4	Phosphatidyl-cholines	-0.101726	0.0346107	0.00848308	-0.0539332	0.0349594	0.194756	-0.126909	0.0343522	0.00061638
PC aa C36:0	Phosphatidylcholine aa C36:0	Phosphatidyl-cholines	0.149138	0.035643	0.00015269	0.195448	0.0355881	1.31038e-06	0.108733	0.0356657	0.00493933
PC aa C36:1	Phosphatidylcholine aa C36:1	Phosphatidyl-cholines	-0.0652419	0.0350848	0.111764	0.0128611	0.0353742	0.77624	-0.075829	0.034903	0.0502849
PC aa C36:2	Phosphatidylcholine aa C36:2	Phosphatidyl-cholines	-0.00730854	0.035264	0.881252	0.0109906	0.0354799	0.79972	0.00481259	0.0351093	0.928879
PC aa C36:3	Phosphatidylcholine aa C36:3	Phosphatidyl-cholines	-0.0634379	0.0354765	0.127938	-0.0119479	0.0357637	0.78741	-0.0563416	0.0353347	0.161959
PC aa C36:4	Phosphatidylcholine aa C36:4	Phosphatidyl-cholines	-0.124314	0.0356145	0.00157948	-0.094572	0.0359505	0.0228708	-0.16614	0.0352406	1.04076e-05
PC aa C36:5	Phosphatidylcholine aa C36:5	Phosphatidyl-cholines	0.137267	0.0354245	0.000444397	0.211211	0.035192	1.53213e-07	0.103725	0.0354087	0.0071391
PC aa C36:6	Phosphatidylcholine aa C36:6	Phosphatidyl-cholines	0.0977258	0.034378	0.0110193	0.179864	0.0341774	4.04991e-06	0.0839317	0.0342709	0.0261541
PC aa C38:0	Phosphatidylcholine aa C38:0	Phosphatidyl-cholines	0.191208	0.0345991	1.28865e-06	0.213747	0.034656	7.3182e-08	0.163814	0.034617	9.72991e-06
PC aa C38:3	Phosphatidylcholine aa C38:3	Phosphatidyl-cholines	-0.12546	0.0342644	0.000918415	-0.0590848	0.0347003	0.149203	-0.136061	0.0340603	0.000202248
PC aa C38:4	Phosphatidylcholine aa C38:4	Phosphatidyl-cholines	-0.140138	0.034791	0.000268346	-0.130927	0.0350541	0.00104097	-0.170427	0.0344646	3.66584e-06
PC aa C38:5	Phosphatidylcholine aa C38:5	Phosphatidyl-cholines	-0.0587361	0.0352435	0.157399	0.0153342	0.0355178	0.737246	-0.0795069	0.0350366	0.0405223
PC aa C38:6	Phosphatidylcholine aa C38:6	Phosphatidyl-cholines	0.170672	0.034826	1.12257e-05	0.235325	0.0345756	7.03504e-09	0.149668	0.0347892	6.03018e-05
PC aa C40:2	Phosphatidylcholine aa C40:2	Phosphatidyl-cholines	0.155746	0.0356648	8.40826e-05	0.162939	0.0358497	6.2859e-05	0.17758	0.0353757	2.65376e-06
PC aa C40:3	Phosphatidylcholine aa C40:3	Phosphatidyl-cholines	0.089159	0.0351847	0.0253225	0.128054	0.0352536	0.00145016	0.114701	0.0349356	0.00239931
PC aa C40:4	Phosphatidylcholine aa C40:4	Phosphatidyl-cholines	-0.257887	0.0349995	2.00872e-10	-0.233018	0.0354455	8.94204e-09	-0.285426	0.0345655	4.75902e-14
PC aa C40:5	Phosphatidylcholine aa C40:5	Phosphatidyl-cholines	-0.19918	0.0351069	7.59279e-07	-0.142636	0.035672	0.000450683	-0.227074	0.0347329	9.77931e-10
PC aa C40:6	Phosphatidylcholine aa C40:6	Phosphatidyl-cholines	0.109769	0.0346507	0.00439496	0.151446	0.034671	0.000118014	0.0783137	0.0346033	0.0409314
PC aa C42:0	Phosphatidylcholine aa C42:0	Phosphatidyl-cholines	0.196119	0.0348005	8.66962e-07	0.217551	0.0348647	5.51029e-08	0.20622	0.0345679	2.54338e-08
PC aa C42:1	Phosphatidylcholine aa C42:1	Phosphatidyl-cholines	0.190886	0.0346291	1.31036e-06	0.199211	0.0347921	5.77449e-07	0.183516	0.0345209	6.91252e-07
PC aa C42:2	Phosphatidylcholine aa C42:2	Phosphatidyl-cholines	0.236733	0.0352649	8.41666e-09	0.202941	0.0357549	6.17856e-07	0.198662	0.0353949	1.50553e-07
PC aa C42:4	Phosphatidylcholine aa C42:4	Phosphatidyl-cholines	-0.0469914	0.0360652	0.276681	-0.00818387	0.0363246	0.858657	-0.00899938	0.0359431	0.853651
PC aa C42:5	Phosphatidylcholine aa C42:5	Phosphatidyl-cholines	0.00882805	0.0357574	0.860453	0.0259606	0.0359672	0.574129	-0.027472	0.0355881	0.526193
PC aa C42:6	Phosphatidylcholine aa C42:6	Phosphatidyl-cholines	0.0483662	0.0351125	0.249649	0.074707	0.0352718	0.0698594	0.051857	0.0349514	0.19828
PC ae C30:0	Phosphatidylcholine ae C30:0	Phosphatidyl-cholines	-0.0891993	0.0358909	0.0282457	0.0246588	0.0362406	0.594701	-0.0471618	0.0358319	0.261411
PC ae C30:2	Phosphatidylcholine ae C30:2	Phosphatidyl-cholines	-0.080241	0.0339719	0.0378059	0.0301123	0.0342835	0.489207	-0.0438257	0.0339047	0.270939
PC ae C32:1	Phosphatidylcholine ae C32:1	Phosphatidyl-cholines	-0.000188769	0.0358256	0.997735	0.0722069	0.0359557	0.087289	-0.018488	0.035662	0.686846
PC ae C32:2	Phosphatidylcholine ae C32:2	Phosphatidyl-cholines	0.0186695	0.0343362	0.67851	0.0971646	0.0343828	0.0148118	0.00401782	0.0341911	0.938082
PC ae C34:0	Phosphatidylcholine ae C34:0	Phosphatidyl-cholines	-0.116783	0.0359838	0.00347068	-0.0153817	0.0364389	0.741468	-0.133935	0.0357483	0.00051155
PC ae C34:1	Phosphatidylcholine ae C34:1	Phosphatidyl-cholines	-0.0639933	0.03503	0.119304	0.0637805	0.0352471	0.123936	-0.0206153	0.0349409	0.640581
PC ae C34:2	Phosphatidylcholine ae C34:2	Phosphatidyl-cholines	-0.028357	0.0356167	0.528176	0.0351735	0.0358286	0.432746	-0.00222759	0.0354739	0.96745
PC ae C34:3	Phosphatidylcholine ae C34:3	Phosphatidyl-cholines	0.014334	0.0356794	0.765001	0.0493704	0.0358602	0.251575	0.0108994	0.0355238	0.815028
PC ae C36:0	Phosphatidylcholine ae C36:0	Phosphatidyl-cholines	0.089496	0.0362667	0.0292435	0.11433	0.0364049	0.00626772	0.0259802	0.0362326	0.560098
PC ae C36:1	Phosphatidylcholine ae C36:1	Phosphatidyl-cholines	-0.12825	0.0348186	0.000860668	0.0329023	0.0353096	0.460384	-0.0685425	0.0348739	0.0804556
PC ae C36:2	Phosphatidylcholine ae C36:2	Phosphatidyl-cholines	-0.0513902	0.0355209	0.225105	0.0530617	0.0357371	0.212232	0.0180586	0.035405	0.691803
PC ae C36:3	Phosphatidylcholine ae C36:3	Phosphatidyl-cholines	-0.0503979	0.0357154	0.237652	-0.00348419	0.0359798	0.938454	-0.0348232	0.0355812	0.412022
PC ae C36:4	Phosphatidylcholine ae C36:4	Phosphatidyl-cholines	-0.150956	0.0360216	0.000151751	-0.113862	0.0364173	0.00651818	-0.185046	0.0356594	1.21194e-06
PC ae C36:5	Phosphatidylcholine ae C36:5	Phosphatidyl-cholines	-0.0637622	0.0358163	0.129539	-0.0162411	0.0361036	0.728728	-0.101755	0.0355477	0.00866343
PC ae C38:0	Phosphatidylcholine ae C38:0	Phosphatidyl-cholines	0.14893	0.0341659	8.49685e-05	0.227459	0.0338397	7.03504e-09	0.159492	0.0339521	1.10219e-05
PC ae C38:1	Phosphatidylcholine ae C38:1	Phosphatidyl-cholines	0.0902835	0.0365596	0.0292334	0.0565427	0.0368705	0.197635	0.0685846	0.0364566	0.093353
PC ae C38:2	Phosphatidylcholine ae C38:2	Phosphatidyl-cholines	0.0210945	0.0351952	0.638546	0.0859732	0.0352892	0.035984	0.0693304	0.0349623	0.0779546
PC ae C38:3	Phosphatidylcholine ae C38:3	Phosphatidyl-cholines	-0.191941	0.0344601	1.08144e-06	-0.0731766	0.0352433	0.0760389	-0.150932	0.0345578	4.76681e-05
PC ae C38:4	Phosphatidylcholine ae C38:4	Phosphatidyl-cholines	-0.227314	0.0356625	3.62072e-08	-0.16922	0.0362921	4.25854e-05	-0.227731	0.0354942	1.98481e-09
PC ae C38:5	Phosphatidylcholine ae C38:5	Phosphatidyl-cholines	-0.0850719	0.0363927	0.039819	-0.0517837	0.036696	0.239165	-0.107601	0.0361565	0.00620363
PC ae C38:6	Phosphatidylcholine ae C38:6	Phosphatidyl-cholines	0.064136	0.0349781	0.117967	0.119902	0.0350117	0.00264458	0.040694	0.0348676	0.325155
PC ae C40:1	Phosphatidylcholine ae C40:1	Phosphatidyl-cholines	0.111007	0.0352991	0.00464283	0.169065	0.0352318	2.69124e-05	0.108548	0.0351514	0.00439542
PC ae C40:2	Phosphatidylcholine ae C40:2	Phosphatidyl-cholines	-0.00745528	0.0350448	0.880043	0.12552	0.0349812	0.00159794	-0.00119	0.0348915	0.983352
PC ae C40:3	Phosphatidylcholine ae C40:3	Phosphatidyl-cholines	-0.0563107	0.034385	0.164288	0.0167033	0.0346496	0.707301	-0.0332171	0.0342709	0.416785
PC ae C40:4	Phosphatidylcholine ae C40:4	Phosphatidyl-cholines	-0.127277	0.0360576	0.00141274	-0.0951332	0.036406	0.0237961	-0.125539	0.0359041	0.00121346
PC ae C40:5	Phosphatidylcholine ae C40:5	Phosphatidyl-cholines	-0.071784	0.0360271	0.08662	-0.0183946	0.036333	0.698204	-0.0893521	0.0358184	0.0235038
PC ae C40:6	Phosphatidylcholine ae C40:6	Phosphatidyl-cholines	0.0977688	0.0354645	0.013704	0.176081	0.0353073	1.27679e-05	0.10873	0.0352668	0.00444827
PC ae C42:1	Phosphatidylcholine ae C42:1	Phosphatidyl-cholines	0.017555	0.0354467	0.705319	0.0555788	0.0356163	0.188682	0.00832897	0.0352949	0.86354
PC ae C42:2	Phosphatidylcholine ae C42:2	Phosphatidyl-cholines	0.0600537	0.0348233	0.142481	0.137597	0.0347641	0.00052535	0.0493472	0.0346906	0.221955
PC ae C42:3	Phosphatidylcholine ae C42:3	Phosphatidyl-cholines	0.183907	0.0345415	2.85384e-06	0.226026	0.0344499	8.94204e-09	0.174121	0.0344478	2.2863e-06
PC ae C42:4	Phosphatidylcholine ae C42:4	Phosphatidyl-cholines	0.0192586	0.0362234	0.684742	0.0438436	0.0364199	0.32144	0.0500484	0.0360269	0.233226
PC ae C42:5	Phosphatidylcholine ae C42:5	Phosphatidyl-cholines	0.00540361	0.0362315	0.910797	0.0412521	0.036426	0.358565	0.0130962	0.0360696	0.782095
PC ae C44:3	Phosphatidylcholine ae C44:3	Phosphatidyl-cholines	0.0516986	0.0357767	0.225105	0.0979187	0.0358773	0.0183207	0.064626	0.0355924	0.106277
PC ae C44:4	Phosphatidylcholine ae C44:4	Phosphatidyl-cholines	0.0141018	0.0360481	0.770127	0.0992179	0.0361035	0.017628	0.0812259	0.0357778	0.0405223
PC ae C44:5	Phosphatidylcholine ae C44:5	Phosphatidyl-cholines	0.0478297	0.0362357	0.271037	0.101675	0.0363211	0.0158686	0.0679281	0.0360356	0.0928713
PC ae C44:6	Phosphatidylcholine ae C44:6	Phosphatidyl-cholines	0.122635	0.0358929	0.00201493	0.130411	0.036083	0.00149173	0.128111	0.0357086	0.000891457
Phe	Phenylalanine	Amino Acids	-0.0334163	0.0359158	0.452806	-0.0832724	0.0360364	0.0460461	-0.0849975	0.0356506	0.0307408
Pro	Proline	Amino Acids	-0.0587574	0.035441	0.15924	-0.114324	0.035491	0.0051149	-0.104486	0.0351521	0.00624779
ProBetaine	Proline betaine	Amino Acid Related	0.0747782	0.0352903	0.065974	0.0787687	0.035498	0.0561913	-0.00439585	0.0352331	0.934845
Putrescine	Putrescine	Biogenic Amines	0.0546543	0.0360173	0.200565	0.108362	0.0360884	0.00911985	0.0692519	0.0358268	0.0849471
Sarcosine	Sarcosine	Amino Acid Related	0.028638	0.036832	0.535992	0.0641052	0.0370034	0.14104	0.00424579	0.0366834	0.938082
SDMA	Symmetric dimethylarginine	Amino Acid Related	-0.00986049	0.0307574	0.816979	-0.0378496	0.0309198	0.312456	0.00153975	0.030624	0.972433
Ser	Serine	Amino Acids	0.0628295	0.0357283	0.134165	0.0123309	0.036015	0.783819	0.037457	0.0356151	0.374393
SM (OH) C14:1	Hydroxysphingo-myelin C14:1	Sphingomyelins	-0.107305	0.0347894	0.00540778	0.044603	0.0351758	0.293274	-0.0306254	0.0348248	0.46288
SM (OH) C16:1	Hydroxysphingo-myelin C16:1	Sphingomyelins	-0.125963	0.0344273	0.000918415	0.0049187	0.0349274	0.911515	-0.0839777	0.0344336	0.0267973
SM (OH) C22:1	Hydroxysphingo-myelin C22:1	Sphingomyelins	-0.066477	0.0341302	0.0948979	0.0300386	0.0344053	0.489967	-0.0225946	0.0340511	0.590853
SM (OH) C22:2	Hydroxysphingo-myelin C22:2	Sphingomyelins	-0.0121492	0.0317605	0.775384	0.100912	0.0317592	0.00566211	0.0280536	0.031608	0.458725
SM (OH) C24:1	Hydroxysphingo-myelin C24:1	Sphingomyelins	-0.00552526	0.0360797	0.909555	0.0705229	0.0362166	0.096413	0.0393953	0.0358944	0.354028
SM C16:0	Sphingomyelin C16:0	Sphingomyelins	0.00911539	0.0349253	0.852718	0.0537408	0.0350904	0.197763	0.0161865	0.0347683	0.722257
SM C16:1	Sphingomyelin C16:1	Sphingomyelins	-0.00605352	0.0325172	0.890586	0.027678	0.0327035	0.499438	-0.021999	0.0323655	0.580325
SM C18:0	Sphingomyelin C18:0	Sphingomyelins	-0.110127	0.033795	0.00335559	-0.0260957	0.0342156	0.552602	-0.12731	0.0335684	0.000429403
SM C18:1	Sphingomyelin C18:1	Sphingomyelins	-0.0960997	0.0321207	0.00719981	-0.0570662	0.0324361	0.136178	-0.149922	0.0317179	9.89069e-06
SM C20:2	Sphingomyelin C20:2	Sphingomyelins	-0.112433	0.0331725	0.00219543	-0.101969	0.0334217	0.00807354	-0.164187	0.0327524	2.72279e-06
SM C24:0	Sphingomyelin C24:0	Sphingomyelins	0.0463087	0.0359104	0.282423	0.0502522	0.0361254	0.247426	0.0678797	0.0357089	0.0901856
SM C24:1	Sphingomyelin C24:1	Sphingomyelins	0.108632	0.0348012	0.00493525	0.162556	0.0347561	4.18879e-05	0.107918	0.0346489	0.00407758
SM C26:0	Sphingomyelin C26:0	Sphingomyelins	0.0288284	0.0364143	0.528604	0.0666534	0.036577	0.122805	0.0175383	0.0362629	0.711183
SM C26:1	Sphingomyelin C26:1	Sphingomyelins	0.14343	0.0356966	0.000277105	0.19918	0.0355869	8.72902e-07	0.138103	0.0355627	0.000307533
t4-OH-Pro	trans-4-Hydroxyproline	Amino Acid Related	-0.121736	0.0346775	0.00149709	-0.197187	0.0344606	5.77449e-07	-0.178426	0.0342131	1.10181e-06
Taurine	Taurine	Amino Acid Related	0.0273269	0.0356854	0.541679	0.0308319	0.0359017	0.49209	-0.0164612	0.0355366	0.722393
TCA	Taurocholic acid	Bile Acids	-0.00411069	0.036851	0.931192	-0.018785	0.0370723	0.698204	-0.0145646	0.0366855	0.763561
TCDCA	Taurochenodeoxy-cholic acid	Bile Acids	-0.0110905	0.0367527	0.826784	-0.0419521	0.0369513	0.357976	-0.039854	0.0365659	0.356436
TDCA	Taurodeoxycholic acid	Bile Acids	-0.000944072	0.0367272	0.986985	-0.0502962	0.0369105	0.256486	-0.039165	0.0365393	0.365729
TG(14:0_32:2)	Triacylglyceride (14:0_32:2)	Triglycerides	-0.124444	0.0366187	0.00213875	-0.107354	0.0369145	0.0118436	-0.199488	0.036036	2.25923e-07
TG(14:0_34:0)	Triacylglyceride (14:0_34:0)	Triglycerides	-0.163697	0.0364457	5.4008e-05	-0.139122	0.0368024	0.000945079	-0.238976	0.0357553	4.3307e-10
TG(14:0_34:1)	Triacylglyceride (14:0_34:1)	Triglycerides	-0.163767	0.0363931	5.27121e-05	-0.129727	0.036793	0.00197988	-0.229497	0.0357802	1.98481e-09
TG(14:0_34:2)	Triacylglyceride (14:0_34:2)	Triglycerides	-0.166493	0.0363675	3.96049e-05	-0.134404	0.0367618	0.00135258	-0.227833	0.0357832	2.47954e-09
TG(14:0_34:3)	Triacylglyceride (14:0_34:3)	Triglycerides	-0.159183	0.0363314	7.98192e-05	-0.127938	0.0367135	0.00218046	-0.206603	0.0358667	7.34177e-08
TG(14:0_35:1)	Triacylglyceride (14:0_35:1)	Triglycerides	-0.155877	0.0365021	0.000113193	-0.0923375	0.0369994	0.032001	-0.179438	0.0362017	3.48844e-06
TG(14:0_35:2)	Triacylglyceride (14:0_35:2)	Triglycerides	-0.170255	0.0363887	2.67562e-05	-0.123572	0.0368523	0.00336045	-0.229686	0.0358117	1.98481e-09
TG(14:0_36:1)	Triacylglyceride (14:0_36:1)	Triglycerides	-0.126302	0.0365504	0.00177225	-0.103014	0.0368695	0.0160248	-0.18608	0.036065	1.39975e-06
TG(14:0_36:2)	Triacylglyceride (14:0_36:2)	Triglycerides	-0.121703	0.0365732	0.00266728	-0.0682616	0.0369735	0.118955	-0.140552	0.0363251	0.000321669
TG(14:0_36:3)	Triacylglyceride (14:0_36:3)	Triglycerides	-0.103262	0.0365005	0.0113776	-0.0816587	0.0367954	0.0561913	-0.121192	0.036269	0.00199186
TG(14:0_36:4)	Triacylglyceride (14:0_36:4)	Triglycerides	-0.068764	0.0365187	0.107657	-0.0761006	0.0367265	0.0764974	-0.100511	0.0362648	0.0112709
TG(14:0_38:4)	Triacylglyceride (14:0_38:4)	Triglycerides	-0.132564	0.0364229	0.000974317	-0.107854	0.036752	0.011039	-0.170631	0.0360605	9.72991e-06
TG(14:0_38:5)	Triacylglyceride (14:0_38:5)	Triglycerides	-0.127541	0.0364598	0.00155664	-0.120391	0.0367179	0.00425845	-0.192679	0.0359359	5.58884e-07
TG(16:0_30:2)	Triacylglyceride (16:0_30:2)	Triglycerides	-0.137372	0.0365747	0.000674292	-0.141825	0.0367827	0.000735227	-0.199538	0.0360495	2.25923e-07
TG(16:0_32:0)	Triacylglyceride (16:0_32:0)	Triglycerides	-0.156906	0.0363697	9.88077e-05	-0.140984	0.0366798	0.000762118	-0.24635	0.0355778	1.13374e-10
TG(16:0_32:1)	Triacylglyceride (16:0_32:1)	Triglycerides	-0.179878	0.036306	8.77716e-06	-0.149346	0.036708	0.000351224	-0.259744	0.035529	1.21845e-11
TG(16:0_32:2)	Triacylglyceride (16:0_32:2)	Triglycerides	-0.184475	0.0362591	5.84991e-06	-0.155921	0.0366556	0.000182647	-0.254439	0.0355586	2.83612e-11
TG(16:0_32:3)	Triacylglyceride (16:0_32:3)	Triglycerides	-0.182582	0.0362393	6.44787e-06	-0.160623	0.0365984	0.000114183	-0.246282	0.0355983	1.13978e-10
TG(16:0_33:1)	Triacylglyceride (16:0_33:1)	Triglycerides	-0.184401	0.0363124	5.97539e-06	-0.135885	0.036808	0.00120478	-0.236676	0.0357649	6.48978e-10
TG(16:0_33:2)	Triacylglyceride (16:0_33:2)	Triglycerides	-0.208854	0.036126	5.3356e-07	-0.149843	0.0367198	0.000338516	-0.241128	0.0357071	2.88451e-10
TG(16:0_34:0)	Triacylglyceride (16:0_34:0)	Triglycerides	-0.181129	0.0359409	6.44787e-06	-0.169104	0.0362419	4.25854e-05	-0.281228	0.0349598	1.21225e-13
TG(16:0_34:1)	Triacylglyceride (16:0_34:1)	Triglycerides	-0.184002	0.0359977	5.40285e-06	-0.150059	0.0364217	0.000302955	-0.263349	0.0352096	4.81908e-12
TG(16:0_34:2)	Triacylglyceride (16:0_34:2)	Triglycerides	-0.193334	0.0360646	2.66122e-06	-0.163583	0.0364771	7.96533e-05	-0.275402	0.0352241	4.90472e-13
TG(16:0_34:3)	Triacylglyceride (16:0_34:3)	Triglycerides	-0.188166	0.0361327	4.36326e-06	-0.160122	0.0365302	0.000114183	-0.266554	0.0353435	3.25978e-12
TG(16:0_34:4)	Triacylglyceride (16:0_34:4)	Triglycerides	-0.159841	0.0363016	7.53017e-05	-0.137072	0.036646	0.00103126	-0.244341	0.0355424	1.45803e-10
TG(16:0_35:1)	Triacylglyceride (16:0_35:1)	Triglycerides	-0.213565	0.0359543	2.83026e-07	-0.171499	0.0364641	3.79834e-05	-0.287784	0.0351332	6.50623e-14
TG(16:0_35:2)	Triacylglyceride (16:0_35:2)	Triglycerides	-0.231578	0.0357131	2.42061e-08	-0.171409	0.0363637	3.79834e-05	-0.29092	0.0349983	3.73527e-14
TG(16:0_35:3)	Triacylglyceride (16:0_35:3)	Triglycerides	-0.212534	0.0357461	2.83026e-07	-0.180992	0.0361909	1.25669e-05	-0.29037	0.0348875	3.73527e-14
TG(16:0_36:2)	Triacylglyceride (16:0_36:2)	Triglycerides	-0.139852	0.0362127	0.000464363	-0.0908855	0.0366331	0.0328105	-0.18162	0.0358168	2.14527e-06
TG(16:0_36:3)	Triacylglyceride (16:0_36:3)	Triglycerides	-0.110724	0.0360859	0.00566592	-0.097925	0.0363566	0.0196744	-0.155313	0.0357182	5.12051e-05
TG(16:0_36:4)	Triacylglyceride (16:0_36:4)	Triglycerides	-0.0743489	0.03616	0.0756464	-0.0999158	0.0363072	0.0175347	-0.127371	0.0358139	0.00099709
TG(16:0_36:5)	Triacylglyceride (16:0_36:5)	Triglycerides	-0.0609338	0.0364426	0.156277	-0.0875617	0.0366003	0.0397378	-0.131373	0.0360476	0.000726443
TG(16:0_36:6)	Triacylglyceride (16:0_36:6)	Triglycerides	-0.0464451	0.0365998	0.290981	-0.0298709	0.0368471	0.521963	-0.120861	0.0362242	0.00201781
TG(16:0_37:3)	Triacylglyceride (16:0_37:3)	Triglycerides	-0.185122	0.0358187	4.96996e-06	-0.13594	0.0363194	0.00103126	-0.260485	0.0350622	6.5377e-12
TG(16:0_38:1)	Triacylglyceride (16:0_38:1)	Triglycerides	-0.130491	0.0363899	0.00116918	-0.0596595	0.0368468	0.173626	-0.162076	0.0360674	2.77252e-05
TG(16:0_38:2)	Triacylglyceride (16:0_38:2)	Triglycerides	-0.142267	0.0361089	0.000359126	-0.0971162	0.036521	0.021275	-0.187454	0.0356869	9.33397e-07
TG(16:0_38:3)	Triacylglyceride (16:0_38:3)	Triglycerides	-0.133236	0.0359462	0.000798879	-0.111893	0.0362616	0.00730471	-0.179517	0.0355315	2.29206e-06
TG(16:0_38:4)	Triacylglyceride (16:0_38:4)	Triglycerides	-0.154867	0.0359202	9.88671e-05	-0.138114	0.0362312	0.000843449	-0.217863	0.0353456	8.19314e-09
TG(16:0_38:5)	Triacylglyceride (16:0_38:5)	Triglycerides	-0.144332	0.0359409	0.000277116	-0.140136	0.0361872	0.000714364	-0.232059	0.035198	7.14983e-10
TG(16:0_38:6)	Triacylglyceride (16:0_38:6)	Triglycerides	-0.0653959	0.0361864	0.123181	-0.0665869	0.0364074	0.122212	-0.16431	0.0356301	1.64229e-05
TG(16:0_38:7)	Triacylglyceride (16:0_38:7)	Triglycerides	0.0244472	0.0366556	0.601868	0.0329623	0.0368731	0.480522	-0.0456269	0.0364687	0.288694
TG(16:0_40:6)	Triacylglyceride (16:0_40:6)	Triglycerides	-0.0725545	0.0364081	0.08662	-0.0206238	0.0367158	0.665925	-0.140575	0.0359962	0.000283099
TG(16:0_40:7)	Triacylglyceride (16:0_40:7)	Triglycerides	0.0596668	0.0365118	0.164891	0.104425	0.0366122	0.0137443	-0.000840509	0.0364117	0.98795
TG(16:0_40:8)	Triacylglyceride (16:0_40:8)	Triglycerides	0.134301	0.0363351	0.000825362	0.146674	0.0365031	0.000421352	0.0630655	0.0364146	0.125387
TG(16:1_32:0)	Triacylglyceride (16:1_32:0)	Triglycerides	-0.162371	0.0364879	6.25879e-05	-0.142219	0.0368224	0.000725355	-0.260961	0.0355979	1.1875e-11
TG(16:1_32:1)	Triacylglyceride (16:1_32:1)	Triglycerides	-0.144121	0.0365344	0.000355115	-0.11735	0.0368825	0.00565442	-0.211796	0.0359542	3.71523e-08
TG(16:1_32:2)	Triacylglyceride (16:1_32:2)	Triglycerides	-0.133686	0.0364594	0.000910913	-0.110776	0.0367829	0.00892187	-0.203008	0.0358921	1.22541e-07
TG(16:1_33:1)	Triacylglyceride (16:1_33:1)	Triglycerides	-0.186061	0.0363127	5.36443e-06	-0.126704	0.0368598	0.00254651	-0.236429	0.0357778	6.67812e-10
TG(16:1_34:0)	Triacylglyceride (16:1_34:0)	Triglycerides	-0.165314	0.0363947	4.53507e-05	-0.13305	0.0367884	0.00149173	-0.244569	0.0356656	1.59572e-10
TG(16:1_34:1)	Triacylglyceride (16:1_34:1)	Triglycerides	-0.189674	0.0362341	3.93964e-06	-0.131658	0.0367829	0.00163658	-0.253478	0.0355758	3.3843e-11
TG(16:1_34:2)	Triacylglyceride (16:1_34:2)	Triglycerides	-0.180074	0.0361585	8.06408e-06	-0.132458	0.0366427	0.00149173	-0.243259	0.035527	1.66539e-10
TG(16:1_34:3)	Triacylglyceride (16:1_34:3)	Triglycerides	-0.159664	0.0360025	6.61417e-05	-0.107386	0.0364696	0.010845	-0.206148	0.0355423	6.01003e-08
TG(16:1_36:1)	Triacylglyceride (16:1_36:1)	Triglycerides	-0.142968	0.0363385	0.000363877	-0.083673	0.0367956	0.0498862	-0.190917	0.0358979	6.91252e-07
TG(16:1_36:2)	Triacylglyceride (16:1_36:2)	Triglycerides	-0.104431	0.0365501	0.0105867	-0.0342015	0.0369425	0.463163	-0.112767	0.0363565	0.00421857
TG(16:1_36:3)	Triacylglyceride (16:1_36:3)	Triglycerides	-0.0712686	0.0364074	0.0932602	-0.0315745	0.0367023	0.49209	-0.0718305	0.0362451	0.0779546
TG(16:1_36:4)	Triacylglyceride (16:1_36:4)	Triglycerides	-0.0330965	0.0363063	0.461237	-0.0390215	0.0365228	0.388895	-0.0500404	0.036122	0.234185
TG(16:1_36:5)	Triacylglyceride (16:1_36:5)	Triglycerides	-0.0352541	0.0362753	0.437224	-0.0258907	0.0365088	0.579086	-0.069916	0.0360524	0.084003
TG(16:1_38:3)	Triacylglyceride (16:1_38:3)	Triglycerides	-0.101914	0.0362899	0.0120671	-0.0518584	0.0366471	0.238946	-0.118669	0.0360647	0.00235038
TG(16:1_38:4)	Triacylglyceride (16:1_38:4)	Triglycerides	-0.145119	0.0361884	0.000279822	-0.101542	0.0365997	0.0166253	-0.18598	0.0357905	1.18994e-06
TG(16:1_38:5)	Triacylglyceride (16:1_38:5)	Triglycerides	-0.11845	0.0361205	0.00314212	-0.0975457	0.0364234	0.020353	-0.181727	0.0356277	1.85887e-06
TG(17:0_34:1)	Triacylglyceride (17:0_34:1)	Triglycerides	-0.181709	0.0361115	6.5038e-06	-0.146885	0.0365372	0.000421352	-0.246203	0.0354645	1.03342e-10
TG(17:0_34:2)	Triacylglyceride (17:0_34:2)	Triglycerides	-0.207169	0.0359813	5.3356e-07	-0.151081	0.0365572	0.000293113	-0.262023	0.0353644	7.17062e-12
TG(17:0_34:3)	Triacylglyceride (17:0_34:3)	Triglycerides	-0.189287	0.0358197	3.29675e-06	-0.13518	0.036351	0.00109685	-0.239703	0.0352754	2.28995e-10
TG(17:0_36:3)	Triacylglyceride (17:0_36:3)	Triglycerides	-0.126569	0.0360423	0.00149709	-0.0710019	0.0364563	0.096413	-0.127371	0.0358777	0.00101547
TG(17:0_36:4)	Triacylglyceride (17:0_36:4)	Triglycerides	-0.0971328	0.0359504	0.0160848	-0.0833583	0.0362167	0.0466235	-0.109375	0.0357466	0.00478383
TG(17:1_32:1)	Triacylglyceride (17:1_32:1)	Triglycerides	-0.185518	0.0363139	5.40285e-06	-0.137672	0.0368082	0.00103126	-0.226251	0.0358577	3.47658e-09
TG(17:1_34:1)	Triacylglyceride (17:1_34:1)	Triglycerides	-0.219588	0.0359203	1.42158e-07	-0.168132	0.0364951	5.15072e-05	-0.282573	0.0351976	1.26386e-13
TG(17:1_34:2)	Triacylglyceride (17:1_34:2)	Triglycerides	-0.20791	0.0358574	5.3356e-07	-0.167137	0.0363513	5.23691e-05	-0.285122	0.0350201	7.7177e-14
TG(17:1_34:3)	Triacylglyceride (17:1_34:3)	Triglycerides	-0.162206	0.0362158	5.64156e-05	-0.109492	0.0366892	0.00961144	-0.201441	0.0358043	1.41364e-07
TG(17:1_36:3)	Triacylglyceride (17:1_36:3)	Triglycerides	-0.0851401	0.0362401	0.0389342	-0.0389489	0.0365629	0.388895	-0.101041	0.0360282	0.0103231
TG(17:1_36:4)	Triacylglyceride (17:1_36:4)	Triglycerides	-0.0496153	0.0361959	0.251934	-0.0607758	0.0363981	0.157024	-0.0964708	0.0359173	0.0142171
TG(17:1_36:5)	Triacylglyceride (17:1_36:5)	Triglycerides	-0.0379824	0.0366368	0.400808	-0.0413676	0.0368581	0.36129	-0.0706748	0.0364144	0.0839886
TG(17:2_34:2)	Triacylglyceride (17:2_34:2)	Triglycerides	-0.105776	0.0363074	0.00915924	-0.10171	0.0365478	0.0163658	-0.185662	0.0357411	1.18994e-06
TG(17:2_34:3)	Triacylglyceride (17:2_34:3)	Triglycerides	-0.0776086	0.0365227	0.0652737	-0.0855758	0.0367268	0.0444931	-0.154607	0.0360524	6.35854e-05
TG(17:2_36:2)	Triacylglyceride (17:2_36:2)	Triglycerides	-0.0428388	0.0363536	0.334443	0.000402171	0.0366092	0.993369	-0.0704316	0.0361393	0.0830083
TG(17:2_36:3)	Triacylglyceride (17:2_36:3)	Triglycerides	-0.0162716	0.0364288	0.733989	-0.0182494	0.036652	0.700791	-0.0459456	0.0362366	0.281233
TG(17:2_36:4)	Triacylglyceride (17:2_36:4)	Triglycerides	-0.0865568	0.0363159	0.036212	-0.0668262	0.0365929	0.12222	-0.148146	0.0359042	0.000120201
TG(17:2_38:5)	Triacylglyceride (17:2_38:5)	Triglycerides	-0.00585513	0.0363279	0.905012	0.0329959	0.0365335	0.476006	-0.0122582	0.036166	0.798112
TG(17:2_38:6)	Triacylglyceride (17:2_38:6)	Triglycerides	0.0349521	0.0366804	0.444805	0.00415186	0.0369269	0.930474	0.0359023	0.0365176	0.411482
TG(18:0_32:0)	Triacylglyceride (18:0_32:0)	Triglycerides	-0.176634	0.0361876	1.20096e-05	-0.189171	0.0363383	5.20513e-06	-0.293029	0.0350624	3.73527e-14
TG(18:0_32:1)	Triacylglyceride (18:0_32:1)	Triglycerides	-0.182737	0.0362615	6.44787e-06	-0.175674	0.0365351	2.6477e-05	-0.274489	0.035363	6.99675e-13
TG(18:0_32:2)	Triacylglyceride (18:0_32:2)	Triglycerides	-0.162527	0.0363519	5.76882e-05	-0.162095	0.0365837	9.77365e-05	-0.259631	0.0354729	1.21845e-11
TG(18:0_34:2)	Triacylglyceride (18:0_34:2)	Triglycerides	-0.180445	0.0357868	6.44787e-06	-0.177667	0.0360313	1.54646e-05	-0.28437	0.0347664	6.50623e-14
TG(18:0_34:3)	Triacylglyceride (18:0_34:3)	Triglycerides	-0.156967	0.0360038	8.49685e-05	-0.14935	0.036271	0.000302955	-0.252672	0.0351513	2.34222e-11
TG(18:0_36:2)	Triacylglyceride (18:0_36:2)	Triglycerides	-0.0917833	0.0360769	0.0247265	-0.0841383	0.0363239	0.0459199	-0.149407	0.0356742	9.51991e-05
TG(18:0_36:3)	Triacylglyceride (18:0_36:3)	Triglycerides	-0.0671438	0.0359408	0.110038	-0.0661663	0.0361653	0.122212	-0.112661	0.0356387	0.00355693
TG(18:0_36:4)	Triacylglyceride (18:0_36:4)	Triglycerides	-0.0273811	0.036044	0.544701	-0.0609395	0.036215	0.15448	-0.0821204	0.0357807	0.0382281
TG(18:0_36:5)	Triacylglyceride (18:0_36:5)	Triglycerides	-0.0204736	0.03631	0.664237	-0.0385449	0.0365154	0.392571	-0.0888889	0.0360206	0.0252293
TG(18:0_38:6)	Triacylglyceride (18:0_38:6)	Triglycerides	0.00578118	0.035429	0.905012	-0.0108664	0.0356457	0.801861	-0.0569962	0.0352161	0.156251
TG(18:0_38:7)	Triacylglyceride (18:0_38:7)	Triglycerides	0.0547252	0.0361644	0.20088	0.0838925	0.0363181	0.0460461	3.01853e-05	0.0360567	0.999332
TG(18:1_28:1)	Triacylglyceride (18:1_28:1)	Triglycerides	-0.105653	0.0367672	0.0101112	-0.086723	0.0370574	0.0436456	-0.163133	0.0363389	2.80924e-05
TG(18:1_30:0)	Triacylglyceride (18:1_30:0)	Triglycerides	-0.159974	0.0364108	7.7566e-05	-0.116124	0.0368463	0.00611455	-0.217123	0.0358731	1.54634e-08
TG(18:1_30:1)	Triacylglyceride (18:1_30:1)	Triglycerides	-0.141685	0.0365298	0.000441451	-0.101257	0.0369255	0.0178371	-0.17966	0.0361556	3.3065e-06
TG(18:1_30:2)	Triacylglyceride (18:1_30:2)	Triglycerides	-0.0913107	0.0366348	0.0279332	-0.0850586	0.0368808	0.0462709	-0.113501	0.0363944	0.00404154
TG(18:1_31:0)	Triacylglyceride (18:1_31:0)	Triglycerides	-0.171497	0.0363888	2.39621e-05	-0.112984	0.036902	0.00785072	-0.188434	0.0361188	1.10181e-06
TG(18:1_32:0)	Triacylglyceride (18:1_32:0)	Triglycerides	-0.180015	0.0360339	7.62707e-06	-0.140985	0.036478	0.000725355	-0.251466	0.0353291	3.44666e-11
TG(18:1_32:1)	Triacylglyceride (18:1_32:1)	Triglycerides	-0.166746	0.0363905	3.94802e-05	-0.106073	0.0369018	0.0130814	-0.213381	0.035919	2.85926e-08
TG(18:1_32:2)	Triacylglyceride (18:1_32:2)	Triglycerides	-0.126818	0.0364528	0.00163731	-0.0872426	0.0368247	0.0416781	-0.155714	0.0361491	6.00634e-05
TG(18:1_32:3)	Triacylglyceride (18:1_32:3)	Triglycerides	-0.115158	0.0363933	0.0044171	-0.0896518	0.0367092	0.0355815	-0.147032	0.0360867	0.000147754
TG(18:1_33:0)	Triacylglyceride (18:1_33:0)	Triglycerides	-0.186728	0.0360994	4.96996e-06	-0.128831	0.036642	0.0020158	-0.227396	0.0356411	2.36306e-09
TG(18:1_33:1)	Triacylglyceride (18:1_33:1)	Triglycerides	-0.192401	0.0361649	2.85384e-06	-0.100257	0.0368556	0.0185967	-0.194542	0.0359857	4.45464e-07
TG(18:1_33:2)	Triacylglyceride (18:1_33:2)	Triglycerides	-0.151323	0.0363054	0.000156316	-0.0720739	0.0368354	0.0961102	-0.137763	0.0362099	0.000411798
TG(18:1_33:3)	Triacylglyceride (18:1_33:3)	Triglycerides	-0.0914436	0.0365285	0.0274779	-0.0355773	0.0368757	0.440912	-0.0935733	0.0363597	0.0190212
TG(18:1_34:1)	Triacylglyceride (18:1_34:1)	Triglycerides	-0.132416	0.0362932	0.000948498	-0.0793635	0.0367122	0.0643483	-0.171499	0.0359248	8.14248e-06
TG(18:1_34:2)	Triacylglyceride (18:1_34:2)	Triglycerides	-0.111695	0.0362166	0.00540778	-0.0862005	0.0365287	0.0423144	-0.150626	0.0358779	9.23101e-05
TG(18:1_34:3)	Triacylglyceride (18:1_34:3)	Triglycerides	-0.0828386	0.0364309	0.0460822	-0.0490123	0.0367326	0.266578	-0.103964	0.0362015	0.00845085
TG(18:1_34:4)	Triacylglyceride (18:1_34:4)	Triglycerides	-0.0555165	0.0364456	0.198961	-0.0267679	0.0367109	0.570111	-0.0835949	0.0362174	0.0372195
TG(18:1_35:2)	Triacylglyceride (18:1_35:2)	Triglycerides	-0.151217	0.0360859	0.000151751	-0.0793464	0.036597	0.0636192	-0.168317	0.0358284	1.10219e-05
TG(18:1_35:3)	Triacylglyceride (18:1_35:3)	Triglycerides	-0.115578	0.0361211	0.00396575	-0.0655068	0.0365019	0.127095	-0.131947	0.0358896	0.000649506
TG(18:1_36:0)	Triacylglyceride (18:1_36:0)	Triglycerides	-0.127498	0.0359968	0.00135989	-0.0942156	0.036349	0.0250169	-0.141796	0.0357687	0.00022656
TG(18:1_36:1)	Triacylglyceride (18:1_36:1)	Triglycerides	-0.0898774	0.0361658	0.0282457	-0.0518702	0.0364826	0.236776	-0.123127	0.0358822	0.00149317
TG(18:1_36:2)	Triacylglyceride (18:1_36:2)	Triglycerides	-0.0459888	0.0364911	0.294525	0.00391983	0.0367519	0.93311	-0.0357898	0.0363445	0.411482
TG(18:1_36:3)	Triacylglyceride (18:1_36:3)	Triglycerides	0.000103254	0.0363693	0.997735	0.0125509	0.0365906	0.783819	0.00696489	0.0362084	0.893531
TG(18:1_36:4)	Triacylglyceride (18:1_36:4)	Triglycerides	0.0240025	0.0363505	0.603838	0.00850396	0.036583	0.854762	0.0104039	0.0361985	0.827118
TG(18:1_36:5)	Triacylglyceride (18:1_36:5)	Triglycerides	0.0479387	0.0365028	0.273277	0.0406401	0.0367391	0.369749	0.0315291	0.0363643	0.469872
TG(18:1_36:6)	Triacylglyceride (18:1_36:6)	Triglycerides	0.0619562	0.0364414	0.148936	0.077757	0.0366289	0.0693393	0.0247601	0.0363359	0.580325
TG(18:1_38:5)	Triacylglyceride (18:1_38:5)	Triglycerides	-0.0462561	0.0361329	0.286238	-0.0150259	0.0363888	0.745348	-0.0960739	0.0358502	0.0144143
TG(18:1_38:6)	Triacylglyceride (18:1_38:6)	Triglycerides	0.0935844	0.0358332	0.0205647	0.105785	0.0360135	0.0110189	0.0157006	0.035823	0.739006
TG(18:1_38:7)	Triacylglyceride (18:1_38:7)	Triglycerides	0.149229	0.0358114	0.000156316	0.168996	0.0359275	3.79834e-05	0.0989463	0.0358685	0.0116469
TG(18:2_28:0)	Triacylglyceride (18:2_28:0)	Triglycerides	-0.101774	0.0367363	0.0132153	-0.119494	0.0368983	0.00485931	-0.155222	0.0363376	6.79804e-05
TG(18:2_30:0)	Triacylglyceride (18:2_30:0)	Triglycerides	-0.151947	0.0363635	0.000153296	-0.143166	0.0366365	0.000636337	-0.220458	0.0357567	8.19314e-09
TG(18:2_30:1)	Triacylglyceride (18:2_30:1)	Triglycerides	-0.12971	0.0364516	0.00128742	-0.111633	0.0367539	0.00838322	-0.166292	0.0361017	1.67121e-05
TG(18:2_32:0)	Triacylglyceride (18:2_32:0)	Triglycerides	-0.17389	0.0359176	1.4144e-05	-0.166246	0.0361901	5.23691e-05	-0.255631	0.0351358	1.47721e-11
TG(18:2_32:1)	Triacylglyceride (18:2_32:1)	Triglycerides	-0.158928	0.0362617	7.98192e-05	-0.124966	0.0366551	0.00277203	-0.21271	0.0357506	2.749e-08
TG(18:2_32:2)	Triacylglyceride (18:2_32:2)	Triglycerides	-0.0907547	0.0363651	0.0278137	-0.0930946	0.0365834	0.0283246	-0.125551	0.0360736	0.00127421
TG(18:2_33:0)	Triacylglyceride (18:2_33:0)	Triglycerides	-0.205738	0.0357717	5.3356e-07	-0.151389	0.0363365	0.000258007	-0.245635	0.0352903	9.41288e-11
TG(18:2_33:1)	Triacylglyceride (18:2_33:1)	Triglycerides	-0.171197	0.0360787	2.09125e-05	-0.110404	0.0366006	0.00884936	-0.181409	0.0358528	2.24729e-06
TG(18:2_33:2)	Triacylglyceride (18:2_33:2)	Triglycerides	-0.101603	0.0363154	0.0123382	-0.0761456	0.0366185	0.075792	-0.0981161	0.0361661	0.0131726
TG(18:2_34:0)	Triacylglyceride (18:2_34:0)	Triglycerides	-0.135334	0.0359086	0.000646034	-0.130447	0.0361561	0.00151284	-0.206415	0.0353205	4.79855e-08
TG(18:2_34:1)	Triacylglyceride (18:2_34:1)	Triglycerides	-0.109713	0.0361128	0.00622627	-0.0971925	0.0363822	0.0206391	-0.15548	0.0357404	5.11188e-05
TG(18:2_34:2)	Triacylglyceride (18:2_34:2)	Triglycerides	-0.0703571	0.0361431	0.0948979	-0.093928	0.0363001	0.0251986	-0.116687	0.0358324	0.00262131
TG(18:2_34:3)	Triacylglyceride (18:2_34:3)	Triglycerides	-0.0378029	0.0363375	0.400808	-0.0543351	0.0365355	0.211952	-0.0674958	0.0361233	0.0957611
TG(18:2_34:4)	Triacylglyceride (18:2_34:4)	Triglycerides	-0.0134087	0.0363473	0.782854	-0.0379492	0.0365496	0.40214	-0.0545695	0.036139	0.189047
TG(18:2_35:1)	Triacylglyceride (18:2_35:1)	Triglycerides	-0.139533	0.035951	0.000440568	-0.0954628	0.036355	0.0230603	-0.154851	0.035711	5.36393e-05
TG(18:2_35:2)	Triacylglyceride (18:2_35:2)	Triglycerides	-0.103395	0.0358973	0.0100574	-0.0873133	0.0361737	0.0378809	-0.124017	0.0356556	0.00127807
TG(18:2_35:3)	Triacylglyceride (18:2_35:3)	Triglycerides	-0.0598485	0.0361681	0.159724	-0.0706421	0.0363674	0.0969581	-0.0932235	0.0359196	0.0180093
TG(18:2_36:0)	Triacylglyceride (18:2_36:0)	Triglycerides	-0.0836755	0.0359983	0.0410568	-0.0891557	0.0362051	0.0338183	-0.144239	0.0355973	0.000161344
TG(18:2_36:1)	Triacylglyceride (18:2_36:1)	Triglycerides	-0.050108	0.0360272	0.244369	-0.0571065	0.0362366	0.185494	-0.0907914	0.0357682	0.0208632
TG(18:2_36:2)	Triacylglyceride (18:2_36:2)	Triglycerides	-0.000662054	0.0362858	0.989695	-0.00306878	0.036509	0.945204	-0.00611866	0.0361255	0.906563
TG(18:2_36:3)	Triacylglyceride (18:2_36:3)	Triglycerides	0.0226908	0.0362969	0.629282	-0.0106376	0.0365274	0.810983	0.0121057	0.0361434	0.799527
TG(18:2_36:4)	Triacylglyceride (18:2_36:4)	Triglycerides	0.0309989	0.0363756	0.494014	-0.0189381	0.03661	0.696233	0.00239759	0.0362318	0.96745
TG(18:2_36:5)	Triacylglyceride (18:2_36:5)	Triglycerides	0.0577423	0.036505	0.180237	0.0132644	0.0367841	0.77684	0.0255063	0.0363899	0.569036
TG(18:2_38:4)	Triacylglyceride (18:2_38:4)	Triglycerides	-0.0598379	0.035771	0.156277	-0.0854558	0.0359273	0.0408351	-0.0979291	0.0355074	0.0116469
TG(18:2_38:5)	Triacylglyceride (18:2_38:5)	Triglycerides	-0.017823	0.0359488	0.705319	-0.038174	0.0361505	0.392571	-0.0802452	0.0356835	0.0421721
TG(18:2_38:6)	Triacylglyceride (18:2_38:6)	Triglycerides	0.119285	0.0357687	0.00261612	0.0845172	0.0361148	0.0436456	0.0381086	0.0358326	0.36955
TG(18:3_30:0)	Triacylglyceride (18:3_30:0)	Triglycerides	-0.127718	0.0365862	0.00157948	-0.103413	0.0369101	0.0158546	-0.184563	0.0361168	1.7879e-06
TG(18:3_32:0)	Triacylglyceride (18:3_32:0)	Triglycerides	-0.154953	0.0362694	0.000113193	-0.140242	0.0365721	0.000780176	-0.234949	0.0355621	6.67812e-10
TG(18:3_32:1)	Triacylglyceride (18:3_32:1)	Triglycerides	-0.13199	0.0364109	0.00102256	-0.0993749	0.0367672	0.0192468	-0.190197	0.0359232	7.56737e-07
TG(18:3_34:0)	Triacylglyceride (18:3_34:0)	Triglycerides	-0.104423	0.0363229	0.0101112	-0.101402	0.0365595	0.0166253	-0.180226	0.0357865	2.46551e-06
TG(18:3_34:1)	Triacylglyceride (18:3_34:1)	Triglycerides	-0.0909329	0.0363553	0.0275119	-0.0812782	0.0366093	0.0561913	-0.148577	0.0359549	0.000117822
TG(18:3_34:2)	Triacylglyceride (18:3_34:2)	Triglycerides	-0.0616961	0.0363604	0.149459	-0.0756558	0.0365523	0.0765979	-0.120593	0.036014	0.001954
TG(18:3_34:3)	Triacylglyceride (18:3_34:3)	Triglycerides	-0.0265134	0.0363642	0.564222	-0.0360565	0.0365781	0.432126	-0.0626224	0.0361485	0.125387
TG(18:3_35:2)	Triacylglyceride (18:3_35:2)	Triglycerides	-0.0828023	0.0362968	0.0453958	-0.0578204	0.0365818	0.184416	-0.113879	0.0360301	0.00355693
TG(18:3_36:1)	Triacylglyceride (18:3_36:1)	Triglycerides	-0.0220898	0.0363768	0.636777	-0.0224873	0.0366006	0.632829	-0.0623272	0.0361579	0.127164
TG(18:3_36:2)	Triacylglyceride (18:3_36:2)	Triglycerides	0.0256857	0.0365247	0.57754	0.0370568	0.0367376	0.418504	0.022178	0.0363668	0.626892
TG(18:3_36:3)	Triacylglyceride (18:3_36:3)	Triglycerides	0.0495387	0.0364463	0.254852	0.0276445	0.0367	0.556633	0.041636	0.0362979	0.332271
TG(18:3_36:4)	Triacylglyceride (18:3_36:4)	Triglycerides	0.0566715	0.0364722	0.189258	0.0164939	0.0367475	0.728728	0.0326324	0.0363482	0.454413
TG(18:3_38:5)	Triacylglyceride (18:3_38:5)	Triglycerides	-0.0249985	0.0360649	0.583592	-0.0229522	0.0362888	0.622021	-0.0718252	0.0358271	0.0743695
TG(18:3_38:6)	Triacylglyceride (18:3_38:6)	Triglycerides	0.0940207	0.0355329	0.0187861	0.0530818	0.0358587	0.213358	0.0139369	0.0355276	0.765597
TG(20:0_32:3)	Triacylglyceride (20:0_32:3)	Triglycerides	-0.102555	0.0361458	0.0111485	-0.0949884	0.0363963	0.0238898	-0.142556	0.0358144	0.000213261
TG(20:0_32:4)	Triacylglyceride (20:0_32:4)	Triglycerides	-0.0579515	0.0362495	0.174807	-0.0905553	0.0363904	0.0323144	-0.104622	0.0359578	0.0075691
TG(20:0_34:1)	Triacylglyceride (20:0_34:1)	Triglycerides	-0.114784	0.0365499	0.0046834	-0.12802	0.0367231	0.00218046	-0.180106	0.0360547	2.92339e-06
TG(20:1_32:1)	Triacylglyceride (20:1_32:1)	Triglycerides	-0.119049	0.0366291	0.00343578	-0.0670137	0.0370214	0.123936	-0.166181	0.0362346	1.82085e-05
TG(20:1_32:2)	Triacylglyceride (20:1_32:2)	Triglycerides	-0.138036	0.0362353	0.000559012	-0.101335	0.0366128	0.01682	-0.147343	0.0360269	0.000139333
TG(20:1_32:3)	Triacylglyceride (20:1_32:3)	Triglycerides	-0.0744548	0.0365826	0.0788923	-0.0645308	0.0368325	0.136822	-0.0895648	0.0363783	0.0254713
TG(20:1_34:1)	Triacylglyceride (20:1_34:1)	Triglycerides	-0.132929	0.0363244	0.000918415	-0.0867699	0.0367247	0.0421932	-0.170393	0.0359649	9.60817e-06
TG(20:1_34:2)	Triacylglyceride (20:1_34:2)	Triglycerides	-0.111913	0.0362614	0.00540778	-0.0996286	0.0365318	0.0183249	-0.158488	0.0358812	3.87198e-05
TG(20:1_34:3)	Triacylglyceride (20:1_34:3)	Triglycerides	-0.0686502	0.036526	0.108092	-0.0346322	0.0368116	0.455621	-0.0890401	0.0363092	0.0260244
TG(20:2_32:0)	Triacylglyceride (20:2_32:0)	Triglycerides	-0.154151	0.0362502	0.000119764	-0.127415	0.0366072	0.00219433	-0.216951	0.0356812	1.33124e-08
TG(20:2_32:1)	Triacylglyceride (20:2_32:1)	Triglycerides	-0.179677	0.0361824	8.47247e-06	-0.132814	0.0366625	0.00148945	-0.230579	0.035654	1.49942e-09
TG(20:2_34:1)	Triacylglyceride (20:2_34:1)	Triglycerides	-0.141176	0.0360365	0.00038337	-0.112824	0.0363865	0.00705457	-0.185827	0.0356196	1.10181e-06
TG(20:2_34:2)	Triacylglyceride (20:2_34:2)	Triglycerides	-0.113754	0.0361328	0.00461579	-0.114523	0.036355	0.00611455	-0.167772	0.0357066	1.10219e-05
TG(20:2_34:3)	Triacylglyceride (20:2_34:3)	Triglycerides	-0.0781343	0.03627	0.0609462	-0.0710761	0.0365127	0.096413	-0.120417	0.0359639	0.001954
TG(20:2_36:5)	Triacylglyceride (20:2_36:5)	Triglycerides	-0.0349436	0.0367308	0.444805	-0.0319493	0.0369606	0.49209	-0.0438756	0.036557	0.310331
TG(20:3_32:0)	Triacylglyceride (20:3_32:0)	Triglycerides	-0.200599	0.0359217	1.07003e-06	-0.168453	0.036356	4.77106e-05	-0.277751	0.0351064	2.6228e-13
TG(20:3_32:1)	Triacylglyceride (20:3_32:1)	Triglycerides	-0.193159	0.0361293	2.73052e-06	-0.150199	0.0366123	0.000318222	-0.250635	0.0355185	5.0761e-11
TG(20:3_32:2)	Triacylglyceride (20:3_32:2)	Triglycerides	-0.151736	0.0362555	0.00015269	-0.133546	0.0365724	0.00136184	-0.176531	0.0359512	4.28218e-06
TG(20:3_34:0)	Triacylglyceride (20:3_34:0)	Triglycerides	-0.181185	0.0358634	6.44787e-06	-0.161266	0.0362092	8.9842e-05	-0.254485	0.035137	1.72263e-11
TG(20:3_34:1)	Triacylglyceride (20:3_34:1)	Triglycerides	-0.173548	0.035975	1.50889e-05	-0.141737	0.0363757	0.000657138	-0.236759	0.0353565	4.07663e-10
TG(20:3_34:2)	Triacylglyceride (20:3_34:2)	Triglycerides	-0.152979	0.0358786	0.000115206	-0.158258	0.0360761	0.000114183	-0.224726	0.0352397	2.36897e-09
TG(20:3_34:3)	Triacylglyceride (20:3_34:3)	Triglycerides	-0.116259	0.036121	0.00376206	-0.116865	0.0363438	0.00517294	-0.17094	0.035686	7.58734e-06
TG(20:3_36:3)	Triacylglyceride (20:3_36:3)	Triglycerides	-0.0618908	0.0360027	0.143626	-0.0706537	0.0362052	0.096413	-0.0919714	0.0357629	0.0190461
TG(20:3_36:4)	Triacylglyceride (20:3_36:4)	Triglycerides	-0.0384712	0.0360872	0.388401	-0.06372	0.0362652	0.136345	-0.0950337	0.0357965	0.0154555
TG(20:3_36:5)	Triacylglyceride (20:3_36:5)	Triglycerides	-0.0163266	0.0361702	0.733164	-0.0143222	0.036394	0.757422	-0.0705432	0.0359291	0.0805357
TG(20:4_30:0)	Triacylglyceride (20:4_30:0)	Triglycerides	-0.148885	0.0364897	0.000219724	-0.156407	0.0366799	0.000177793	-0.241685	0.0356967	2.62998e-10
TG(20:4_32:0)	Triacylglyceride (20:4_32:0)	Triglycerides	-0.183708	0.0358691	5.36443e-06	-0.198118	0.0360018	1.30198e-06	-0.294132	0.0347702	2.96251e-14
TG(20:4_32:1)	Triacylglyceride (20:4_32:1)	Triglycerides	-0.184458	0.0359858	5.36443e-06	-0.180583	0.036239	1.27679e-05	-0.280557	0.0350338	1.36443e-13
TG(20:4_32:2)	Triacylglyceride (20:4_32:2)	Triglycerides	-0.156396	0.0359876	8.79351e-05	-0.186521	0.0360357	5.81346e-06	-0.254553	0.0351147	1.70765e-11
TG(20:4_33:2)	Triacylglyceride (20:4_33:2)	Triglycerides	-0.153082	0.0358149	0.000113193	-0.162426	0.0359893	7.13058e-05	-0.201077	0.0353545	1.07598e-07
TG(20:4_34:0)	Triacylglyceride (20:4_34:0)	Triglycerides	-0.167307	0.0356658	2.56887e-05	-0.171435	0.035867	2.86284e-05	-0.279437	0.0346114	1.05992e-13
TG(20:4_34:1)	Triacylglyceride (20:4_34:1)	Triglycerides	-0.154037	0.0356291	9.6015e-05	-0.163652	0.0358003	5.68833e-05	-0.25393	0.034743	1.21845e-11
TG(20:4_34:2)	Triacylglyceride (20:4_34:2)	Triglycerides	-0.13502	0.0354376	0.000559012	-0.179243	0.0354154	9.6434e-06	-0.239151	0.0345817	1.13978e-10
TG(20:4_34:3)	Triacylglyceride (20:4_34:3)	Triglycerides	-0.102814	0.0355683	0.00978848	-0.15074	0.0355767	0.000193155	-0.201589	0.0348754	6.6399e-08
TG(20:4_36:2)	Triacylglyceride (20:4_36:2)	Triglycerides	-0.0690153	0.0350237	0.0908364	-0.0960213	0.0351613	0.0183207	-0.136879	0.0346175	0.000234813
TG(20:4_36:3)	Triacylglyceride (20:4_36:3)	Triglycerides	-0.0536557	0.0349228	0.194557	-0.111206	0.0349693	0.00565442	-0.125687	0.0345357	0.000736714
TG(20:4_36:4)	Triacylglyceride (20:4_36:4)	Triglycerides	-0.033764	0.0352785	0.444763	-0.112868	0.0352912	0.00540179	-0.117165	0.0348984	0.00191086
TG(20:4_36:5)	Triacylglyceride (20:4_36:5)	Triglycerides	-0.0044381	0.0353938	0.92404	-0.0649627	0.035538	0.122212	-0.0903948	0.0350932	0.0189713
TG(20:5_34:0)	Triacylglyceride (20:5_34:0)	Triglycerides	0.0243066	0.0366332	0.602939	0.0533498	0.0368206	0.225749	-0.0513619	0.0364368	0.225956
TG(20:5_34:1)	Triacylglyceride (20:5_34:1)	Triglycerides	0.0707826	0.036573	0.0970148	0.102352	0.0367062	0.0161985	-0.00656306	0.0364964	0.901845
TG(20:5_34:2)	Triacylglyceride (20:5_34:2)	Triglycerides	0.0967285	0.0365136	0.0187073	0.107297	0.0367037	0.0113653	0.0230813	0.0365029	0.611321
TG(20:5_36:2)	Triacylglyceride (20:5_36:2)	Triglycerides	0.163847	0.0359236	4.22203e-05	0.191564	0.0359799	3.07167e-06	0.125427	0.0359551	0.00124364
TG(20:5_36:3)	Triacylglyceride (20:5_36:3)	Triglycerides	0.168982	0.0358918	2.40882e-05	0.176749	0.0360724	1.74548e-05	0.123758	0.0359603	0.0014467
TG(22:4_32:0)	Triacylglyceride (22:4_32:0)	Triglycerides	-0.188576	0.035951	3.88074e-06	-0.167772	0.0363078	4.94125e-05	-0.25456	0.035273	1.98806e-11
TG(22:4_32:2)	Triacylglyceride (22:4_32:2)	Triglycerides	-0.149306	0.0362157	0.000185321	-0.133882	0.0365182	0.00131515	-0.179755	0.0358788	2.73885e-06
TG(22:4_34:2)	Triacylglyceride (22:4_34:2)	Triglycerides	-0.193762	0.035424	1.56051e-06	-0.206682	0.0355595	4.14669e-07	-0.279276	0.0345379	1.05992e-13
TG(22:5_32:0)	Triacylglyceride (22:5_32:0)	Triglycerides	-0.140368	0.0363878	0.000468808	-0.0863117	0.0368245	0.0436456	-0.208869	0.0358095	5.0497e-08
TG(22:5_32:1)	Triacylglyceride (22:5_32:1)	Triglycerides	-0.115593	0.0365463	0.0044171	-0.0617622	0.036936	0.156801	-0.18756	0.0360067	1.12623e-06
TG(22:5_34:1)	Triacylglyceride (22:5_34:1)	Triglycerides	-0.0803985	0.0364686	0.0539133	-0.0233226	0.0367952	0.622021	-0.137533	0.0360922	0.000404399
TG(22:5_34:2)	Triacylglyceride (22:5_34:2)	Triglycerides	-0.0449074	0.0363992	0.307363	-0.0294052	0.0366434	0.525053	-0.123409	0.0360101	0.00150926
TG(22:5_34:3)	Triacylglyceride (22:5_34:3)	Triglycerides	-0.000883489	0.0363793	0.986985	0.0293805	0.0365885	0.525053	-0.0555206	0.0361659	0.180542
TG(22:6_32:0)	Triacylglyceride (22:6_32:0)	Triglycerides	0.0387929	0.036793	0.393322	0.0794402	0.0369386	0.0652946	-0.0442653	0.0366231	0.307171
TG(22:6_32:1)	Triacylglyceride (22:6_32:1)	Triglycerides	0.0767097	0.0366353	0.0698722	0.113832	0.036742	0.00706175	0.00223038	0.0365738	0.96745
TG(22:6_34:1)	Triacylglyceride (22:6_34:1)	Triglycerides	0.145518	0.036297	0.000279822	0.183923	0.0363078	9.6434e-06	0.0803697	0.0363877	0.0460601
TG(22:6_34:2)	Triacylglyceride (22:6_34:2)	Triglycerides	0.17237	0.036149	1.90465e-05	0.179645	0.0363338	1.49659e-05	0.10487	0.0363089	0.00806004
TG(22:6_34:3)	Triacylglyceride (22:6_34:3)	Triglycerides	0.185233	0.0360137	5.36443e-06	0.199906	0.0361452	1.18492e-06	0.134471	0.0361318	0.000560698
Thr	Threonine	Amino Acids	-0.0179829	0.0368096	0.708981	-0.049119	0.0370011	0.269001	-0.0516244	0.0366076	0.225956
TMAO	Trimethylamine N-oxide	Amine Oxides	0.0371536	0.0360111	0.401626	0.039427	0.0362301	0.379404	-0.0113255	0.0358743	0.809845
TMCA	Tauromuricholic acids	Bile Acids	0.0597019	0.0368265	0.168746	0.0233576	0.0371048	0.622746	0.0749625	0.0366288	0.0677999
Trigonelline	Trigonelline	Alkaloids	0.0630221	0.0364122	0.141101	0.0483791	0.036665	0.272026	0.01465	0.0363161	0.760167
Trp	Tryptophan	Amino Acids	0.0123174	0.0364975	0.804931	0.0186202	0.036719	0.698204	0.0114629	0.0363372	0.809845
TrpBetaine	Tryptophan betaine	Amino Acid Related	0.185623	0.0361657	5.36443e-06	0.15592	0.0365695	0.000177793	0.297757	0.0350477	2.96251e-14
Tyr	Tyrosine	Amino Acids	-0.0301657	0.0368449	0.514831	-0.073454	0.0369963	0.0909333	-0.125917	0.0364271	0.00137578
Val	Valine	Amino Acids	-0.0318932	0.035497	0.467521	-0.0164665	0.0357288	0.722539	-0.0555783	0.0353039	0.168134
